# Supplementary material for: Extensive gene content variation in the Brachypodium distachyon pan-genome correlates with population structure
Source: PubMed Central journal article supplement (PMC5736591; doi:10.1038/s41467-017-02292-8), 2017-12-19
Supplement: 41467_2017_2292_MOESM1_ESM.pdf [file 41467_2017_2292_MOESM1_ESM.pdf]

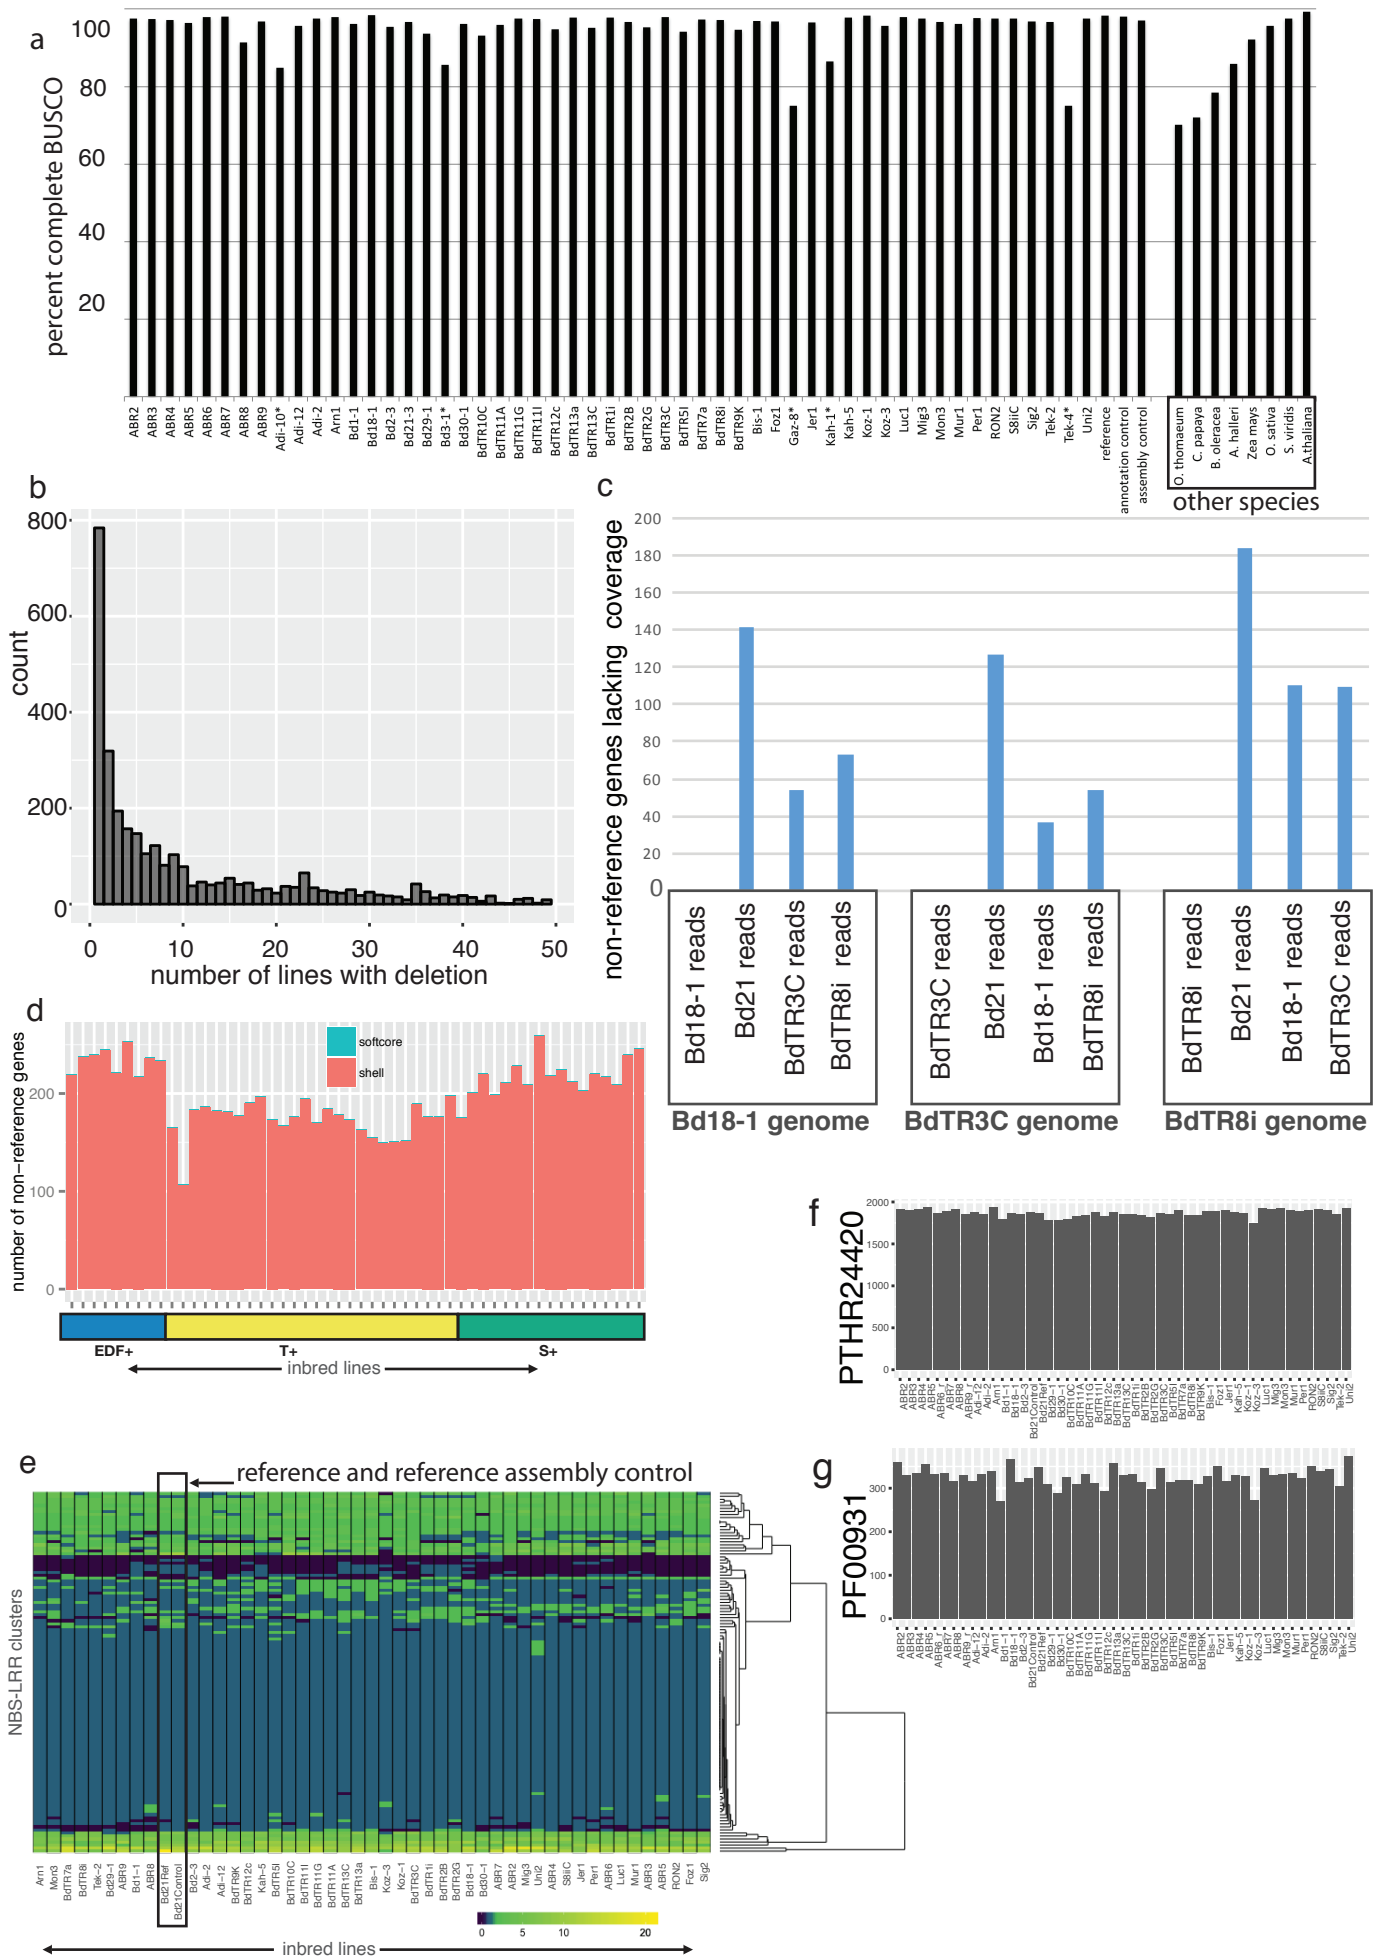

**Supplementary Figure 1.** Estimating assembly completeness and accuracy. **a**, BUSCO percent completeness of all assemblies. Note that, with a few exceptions, the assemblies have the same number of BUSCO genes as the reference genome. All of the assemblies in this study have higher BUSCO completeness than some current reference genomes. **b**, Frequency of the absence of reference genes (Bd21 v2.1 annotation) among sequenced lines, estimated by lack of coverage by aligning short-reads from sequenced lines to the Bd21 reference assembly v2.0. **c**, Illumina short-read sequences from inbred lines Bd21 (the line used to produce the reference genome), Bd18-1, BdTR3C, and BdTR8i aligned to the Bd18-1, BdTR3C, and BdTR8i genome assemblies. Non-reference genes within the Bd18-1, BdTR3C, and BdTR8i assemblies were supported by their own raw reads while lacking coverage from alignment of the other 3 short-reads datasets, in particular the Bd21 reference line. **b-c**, Genes were considered lacking short read coverage or absent if <80% of the overall gene model was supported by alignments of more than three overlapping reads. **d**, Number of non-reference genes per inbred line. The EDF+ group, which is the most divergent from the group in which the reference resides (T+) contains the most shell genes per line. Lines from the T+ group harbor the lowest number of non-reference genes. Displayed non-reference genes are high-confidence as their transcripts do not map to the reference genome. **e**, 119 pan-genome clusters associated with reference genes previously identified as NBS-LRRs are plotted in rows with the number of sequences within each individual colored according to the scale below the plot. **f**, Number of genes annotated as PTHR24420 (Leucine rich repeat receptor-like protein kinase) and **g**, number of PF00931 NB-ARC protein, per inbred line.

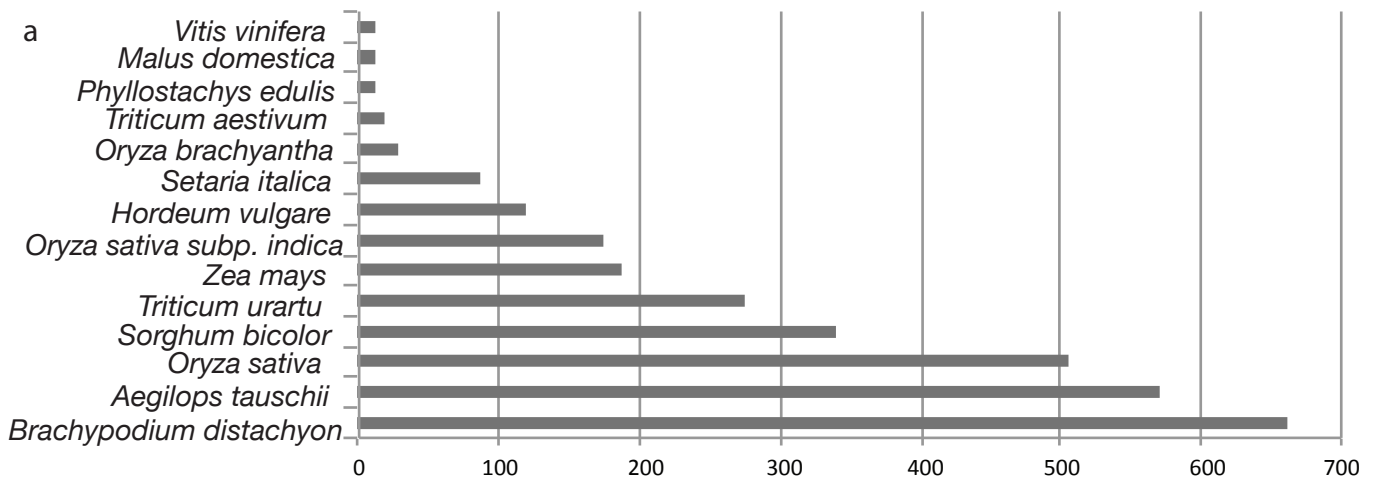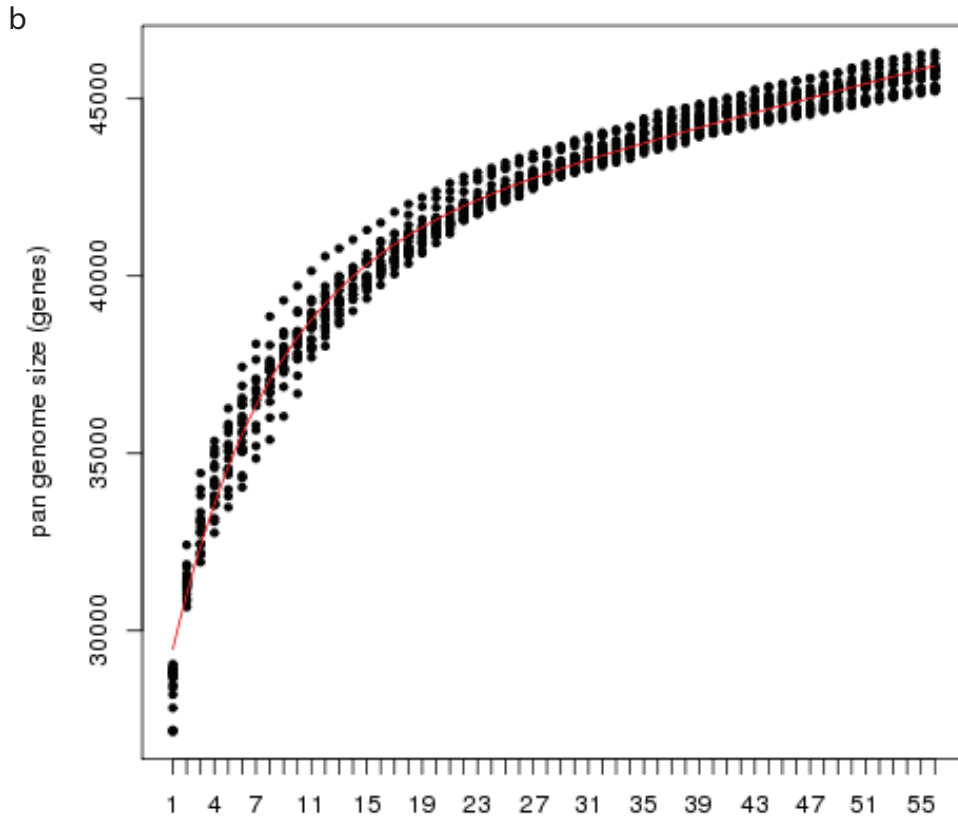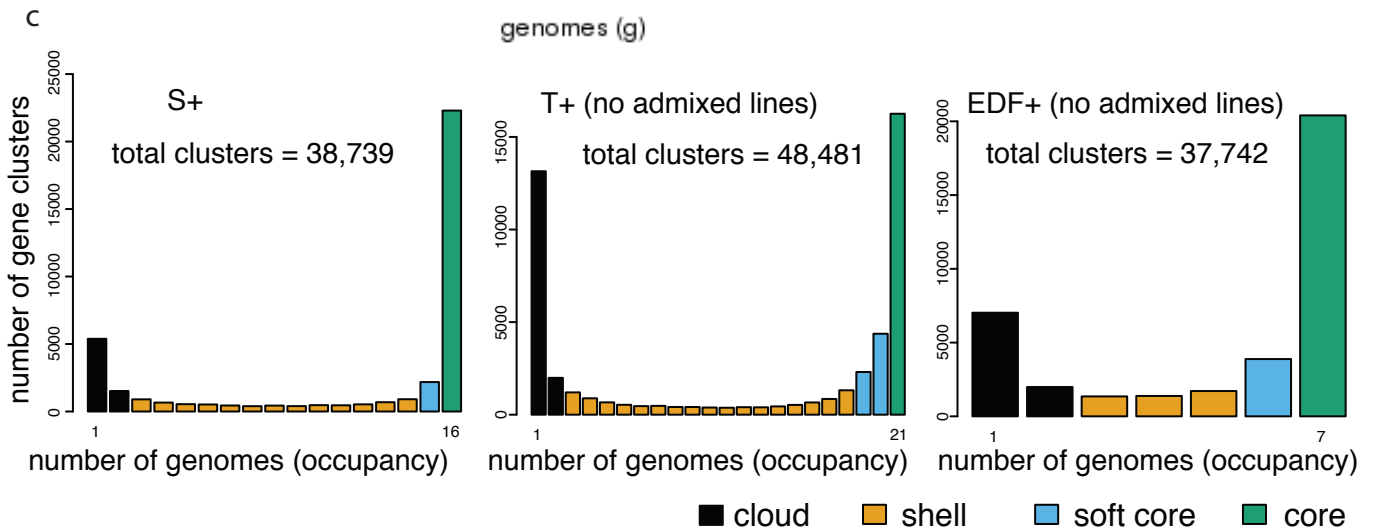

**Supplementary Figure 2.** Pan-genome sampling simulations and BLAST analysis of non-reference genes. **a**, Forty-two percent of high-confidence non-reference genes had BLAST matches to plant species and 78% of those hits were to species other than *B. distachyon* with the largest number of hits arising from the closely related grass, *Aegilops tauschii*, one of the three progenitors of bread wheat. **b**, We examined the relationship between the number of lines sampled and the size of the high-confidence (only includes pan-genes found in three or more lines) pan-genome. The simulations indicate that growth of the pan-genome slows as more lines are added, but does not plateau. This indicates that the full diversity of the species has not yet been captured. Each simulation adds the genomes in different order leading to different sequential increases in pan-genome size. **c**, Population group specific pan-genomes.

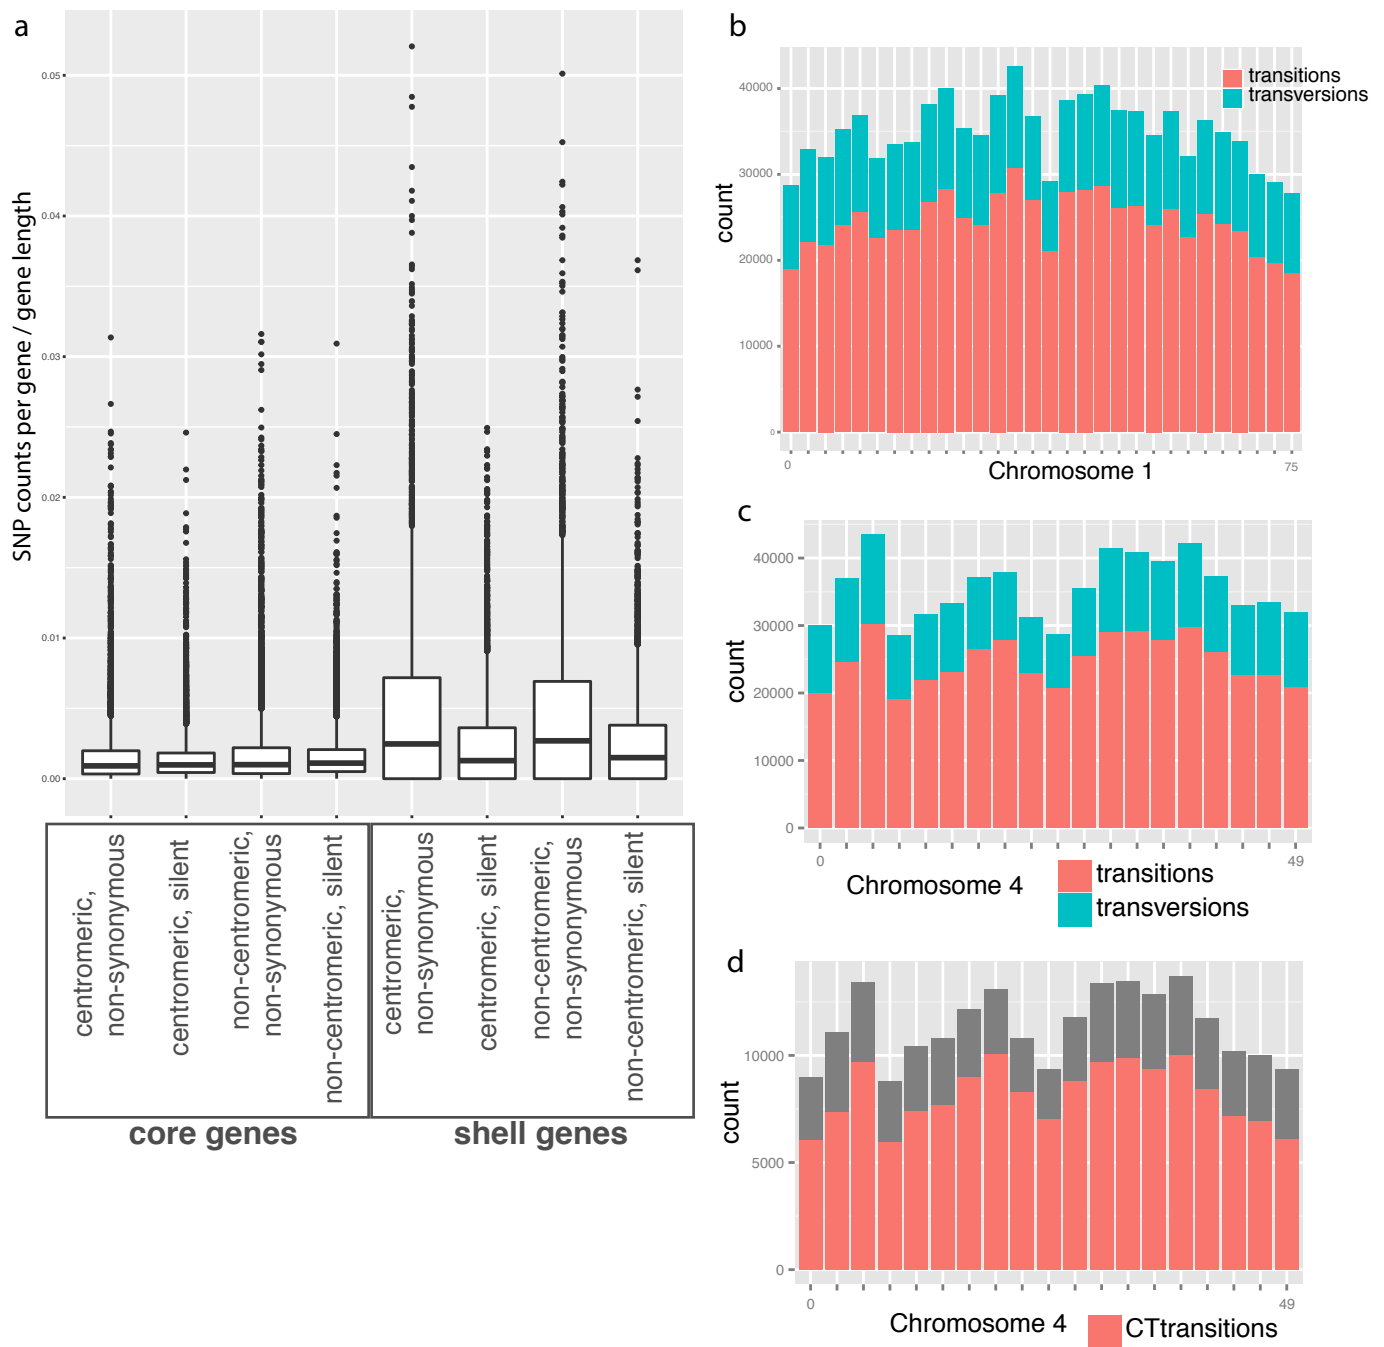

**Supplementary Figure 3.** Shell pan-genes have reduced sequence constraints. a, Shell genes have a higher frequency of non-synonymous and synonymous substitutions than core genes (number of respective differences relative to the reference, normalized according to gene length). However, there is no obvious difference between SNP frequency within genes between peri-centromeric regions as compared to distal regions of the chromosome. b, Higher frequency of SNPs are observed in peri-centromeric regions versus distal chromosome regions, particularly transitions, for representative chromosome 1 (Bd1). c, Similar pattern as panel (b) but for chromosome 4 (Bd4). d, Amongst transitions, C -> T transitions are elevated in peri-centromeric regions compared to distal regions.

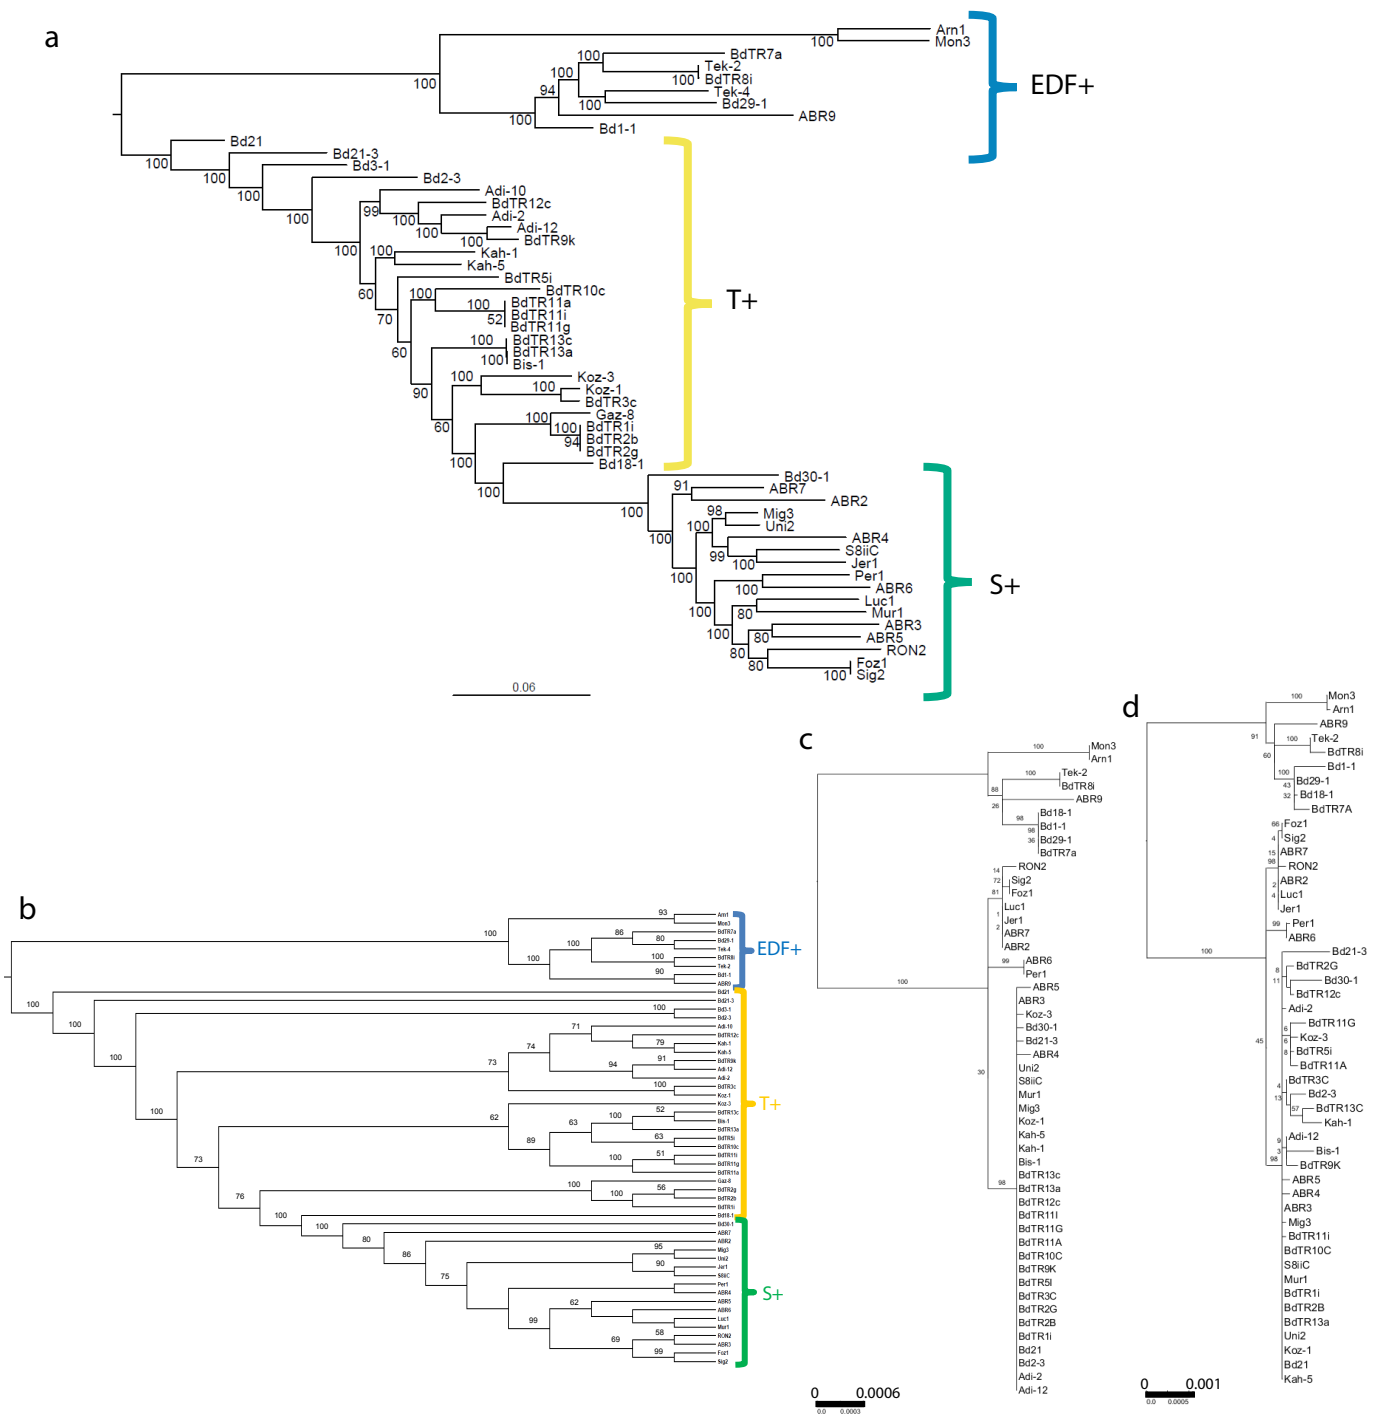

**Supplementary Figure 4.** Genome-wide SNP tree and high resolution gene trees from genome assemblies.

**a**, Maximum likelihood RAxML phylogenetic tree based on >3 million SNPs showing the relationships among 53 *B. distachyon* lines. Bootstrap support values are indicated on branches. The order of lines is the same as shown in figure 4a but the branch lengths are proportional to relatedness. Scale bar represents substitutions per site.

**b**, SVDquartets + Paup\* tree based on >3 million SNPs showing the relationships among 53 *B. distachyon* lines. Note that the topology of the tree is very similar to that of the ML (RAxML) tree. Both trees show full agreement and support for the main clades and subclades, differing only in the reconstruction of few recently evolved and less supported lineages. Bootstrap support values >50% are indicated on the tree cladogram branches.

**c,d**, Phylogenetic analysis of the BdVRN1 gene using variants identified from the genome assemblies is superior to the analysis using variants detected by read mapping to the reference genome. PHYML phylogenetic trees of BdVRN1 constructed from 122 variants identified by read mapping (**c**) and from 194 variants identified from the assembled genomes (**d**). Only three of the read mapping variants were not contained in the set of variants detected from the assembled genomes. Note that the tree based on the genome assemblies (**d**) has higher bootstrap support and higher resolution of closely related alleles than the gene tree based on read mapping (**c**). Branch lengths are proportional to substitutions per site (see scale bar).

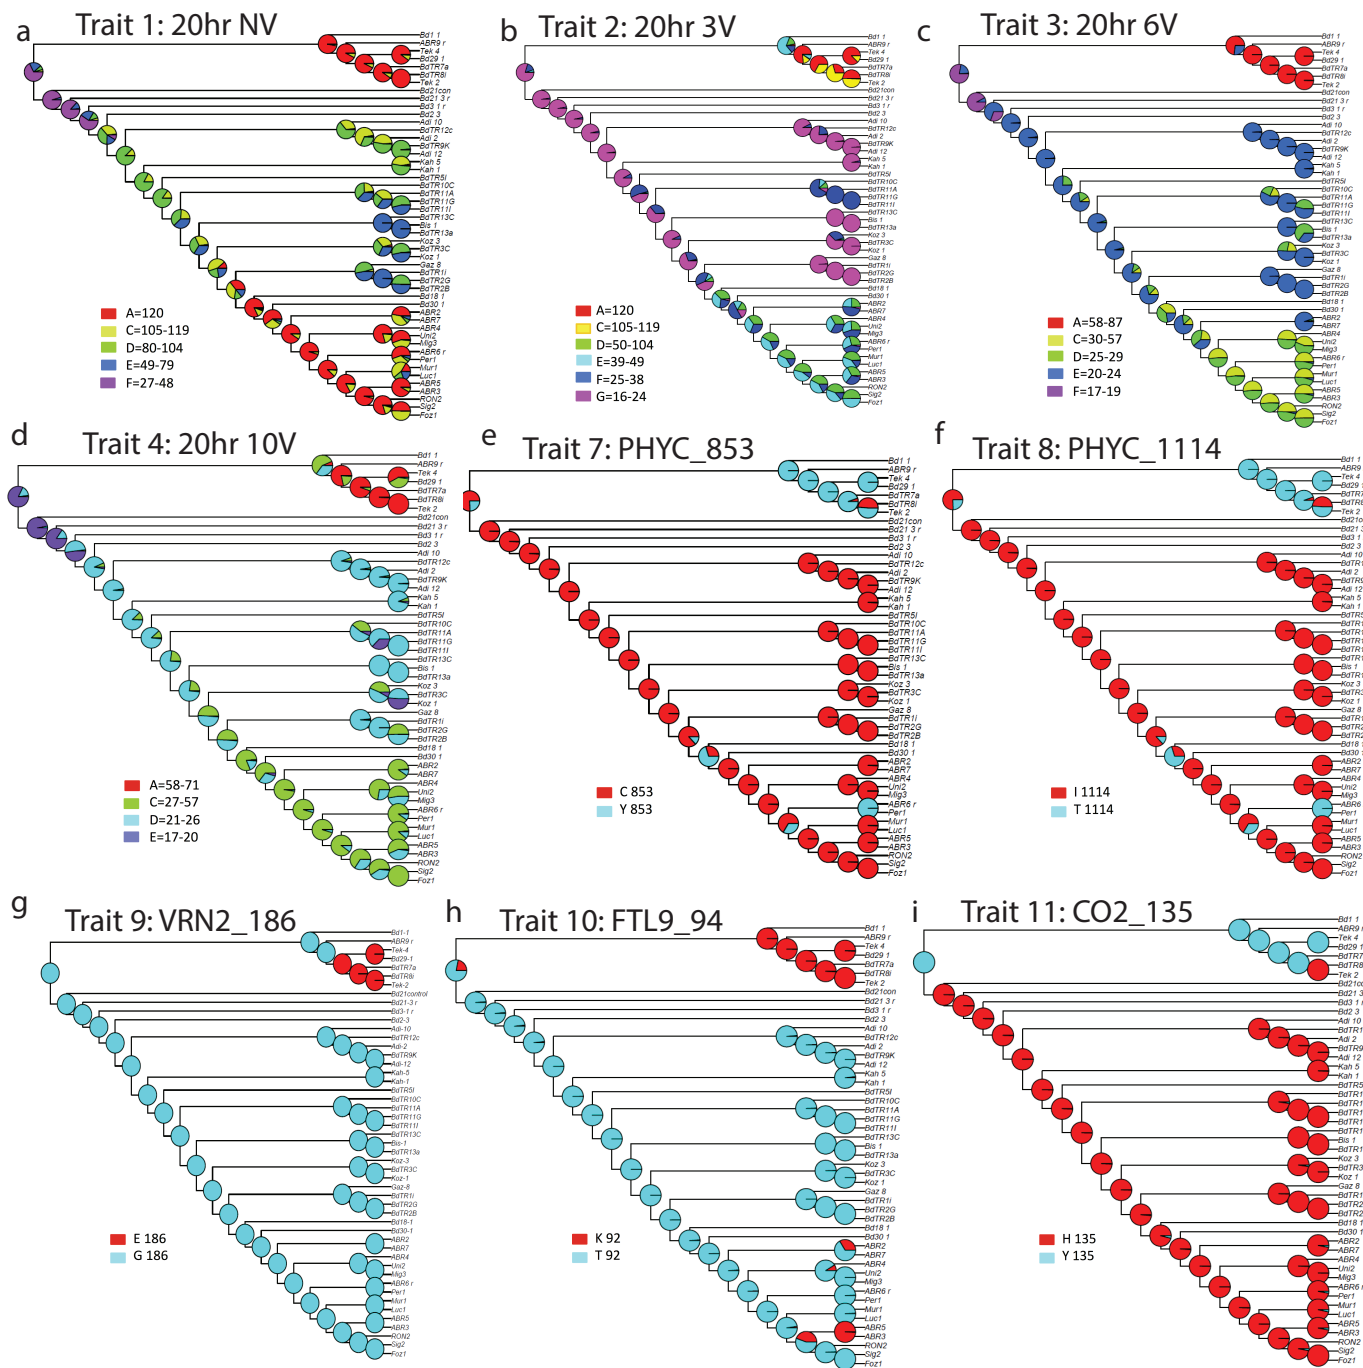

**Supplemental Figure 5.** Mapping the evolution of flowering traits on the *B. distachyon* SNP tree. Introgressed accessions Arn1 and Mon3 were pruned from the *B. distachyon* SNP tree with using the drop.tip option of the R package. A Maximum Likelihood (ML) mapping was performed with the program Bayes Traits. The ML searches were based on 1000 iterations using multistate and binary characters. The program inferred the probabilities of ancestral states at the tree nodes for each trait. Color codes of trait states are indicated in the corresponding charts. Trait numbers and codes correspond to those explained in Supplementary Table 3. ML mapping of flowering traits 20h NV (a), 20h 3V (b), 20h 6V (c), 20h 10V (d), and molecular variants in the PHYC-853 (e), PHYC\_1114 (f), VNR2\_186 (g), FTL9\_94 (h), CO2\_135 (i), CO2\_152 (j), CO2\_217 (k), CO2\_235 (l), CO2\_250 (m), FTL1\_92 (n), FTL13\_7 (o), FUL2\_19 (p), FUL2\_184del (q), PPD1\_283 (r), PPD1\_737 (s), VRN1\_intron1\_4kb (t), VRN1\_intron1\_6kb (u) genes.

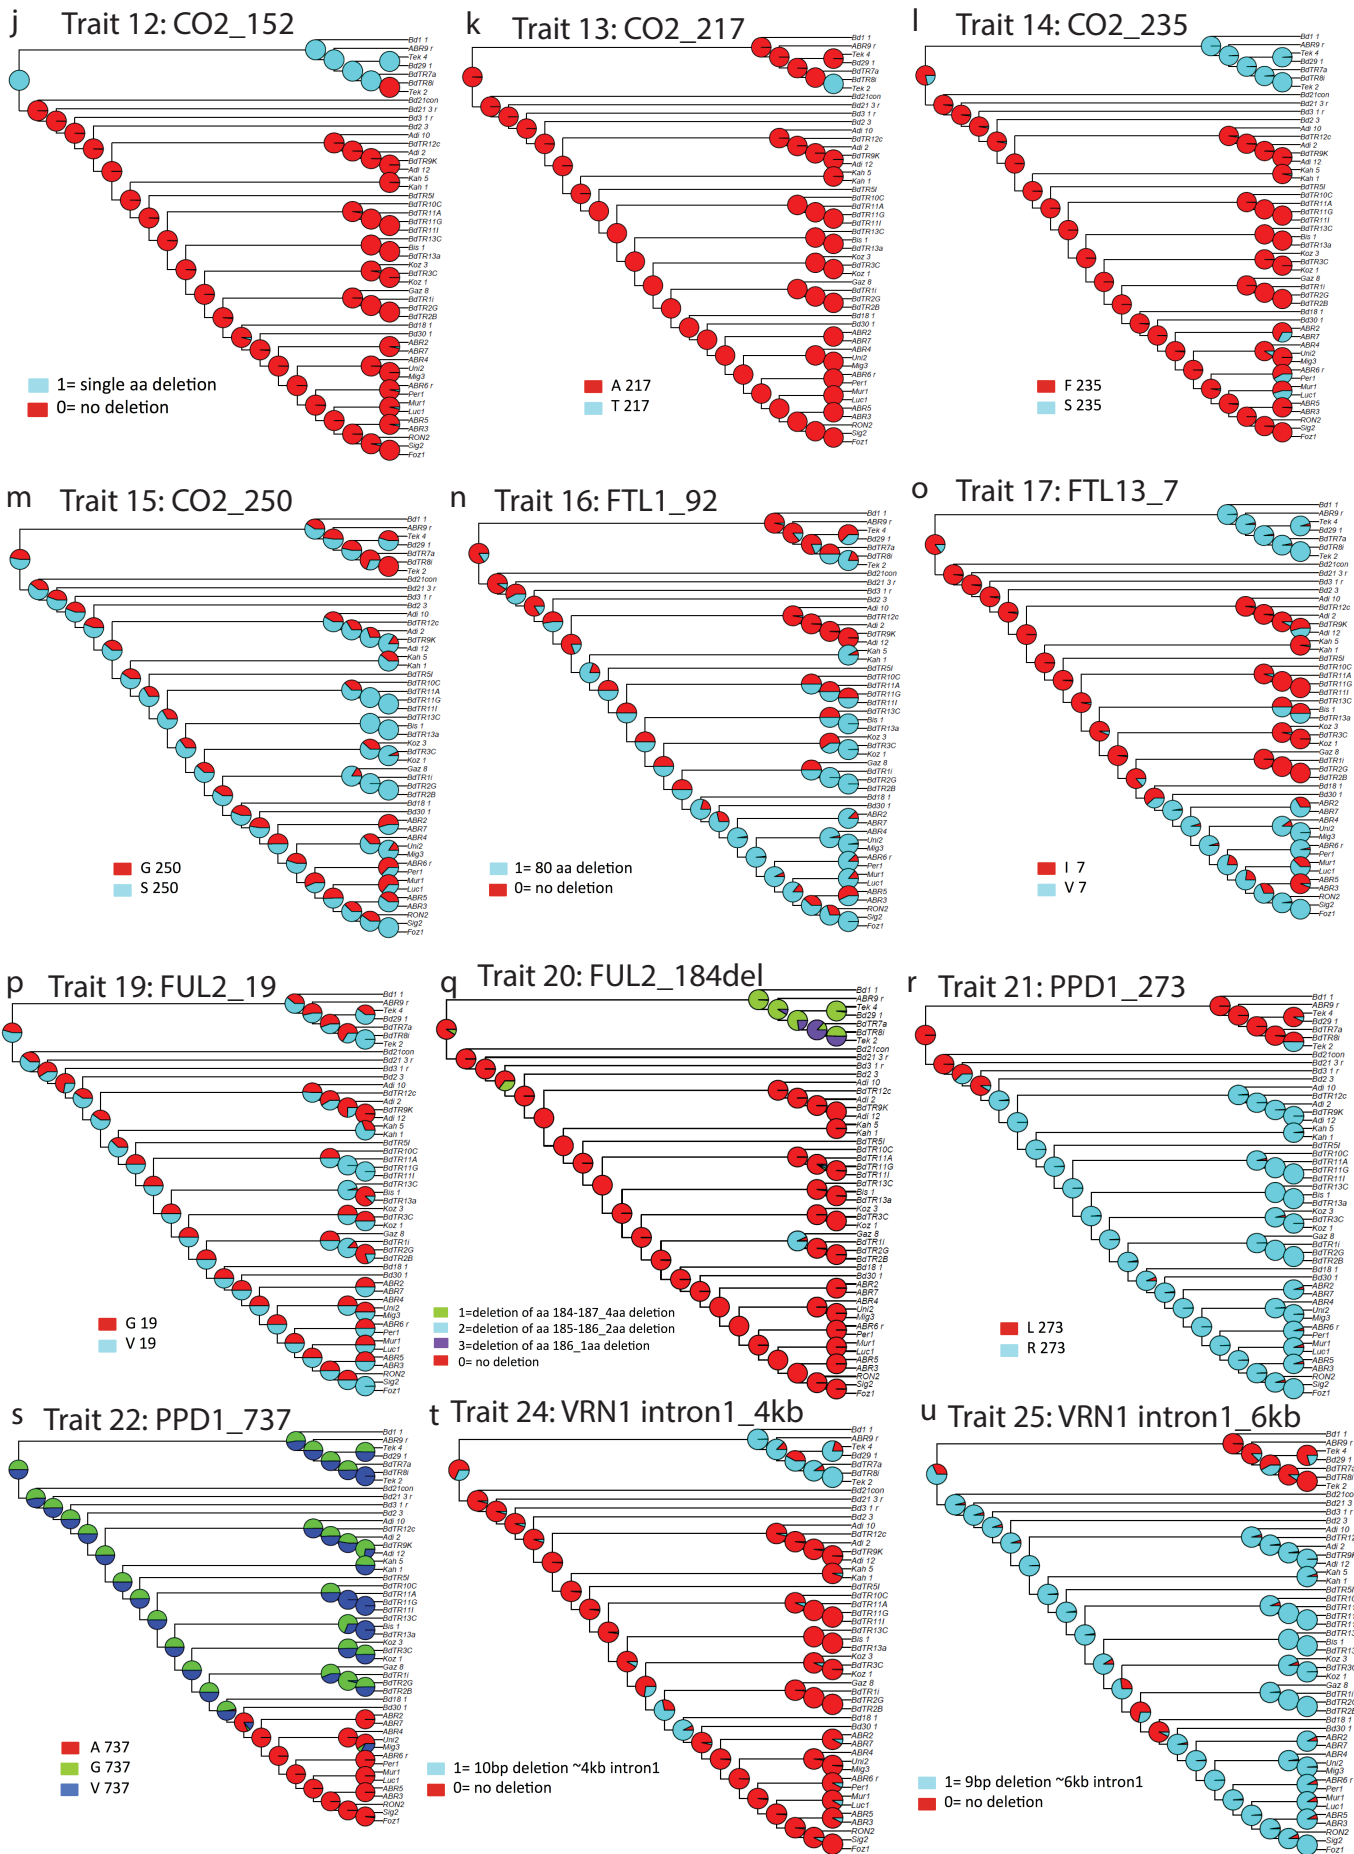

Supplemental Figure 5, continued.



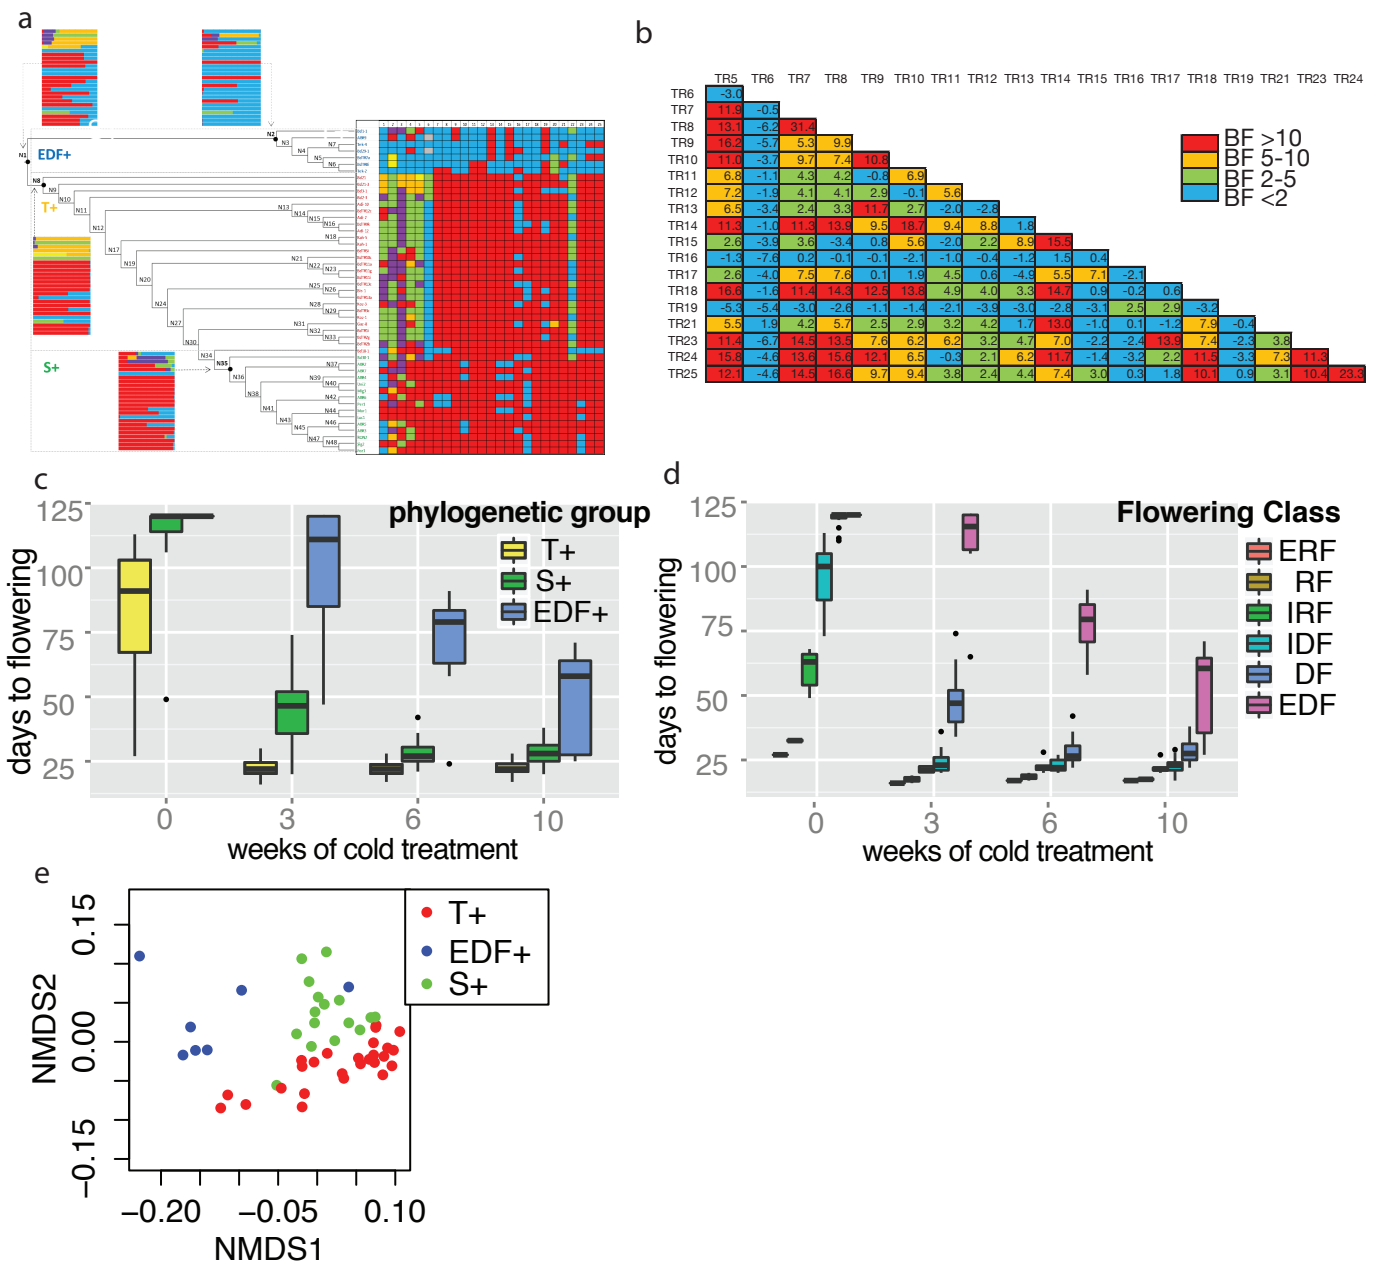

**Supplementary Figure 6.** Correlation between flowering time traits and genetic variation. **a**, Mapping the evolution of flowering traits on the *B. distachyon* SNP tree. Introgressed accessions Arn1 and Mon3 were pruned from the tree using the drop.tip option of the R package APE. A Maximum Likelihood (ML) mapping was performed with the program Bayes Traits. The ML searches were based on 1000 iterations using multistate and binary characters. The program inferred the probabilities of ancestral states at the tree nodes for each trait. Color-coded matrix based on mapping all trait values to discrete state categories. Color codes of trait states are indicated in the corresponding charts. Trait numbers and codes correspond to those explained in Supplementary Table S3. **b**, Correlation of flowering time, latitude and polymorphisms in flowering genes. Bayes Factor (BF) tests for potential correlated evolution of the 19 binary traits (flowering time class, latitude and 17 flowering time genes) shown in (Figure 4c-e) indicated a very strong (BF values >10) and strong (BF = 5-10) evidence of correlation for 13 traits (7-14, 18, 21, 23-25) with flowering class (trait 5) and to each other, and positive evidence (BF = 2-5) for two other traits (15, 17). Conversely, all 18 examined traits showed weak evidence (BF <2) of correlated evolution with latitude (trait 6). Explanation of traits is found in supplementary table 3. **c**, Days to flowering after different periods of cold treatment (vernalization). Data from individual lines are grouped according to the STRUCTURE assignment in figure 4b. Admixed lines Arn1 and Mon3 omitted. **d**, Days to flowering grouped according to flowering class. **e**, Bidimensional plotting based on Non-metric Multidimensional Scaling (NMDS) analysis (scaling factors S1 and S2) grouping lines based Days to flowering. Samples are colored based on membership to STRUCTURE groups. Whiskers in the above plots extend to the most extreme data point which is no more than 1.5 times the IQR.

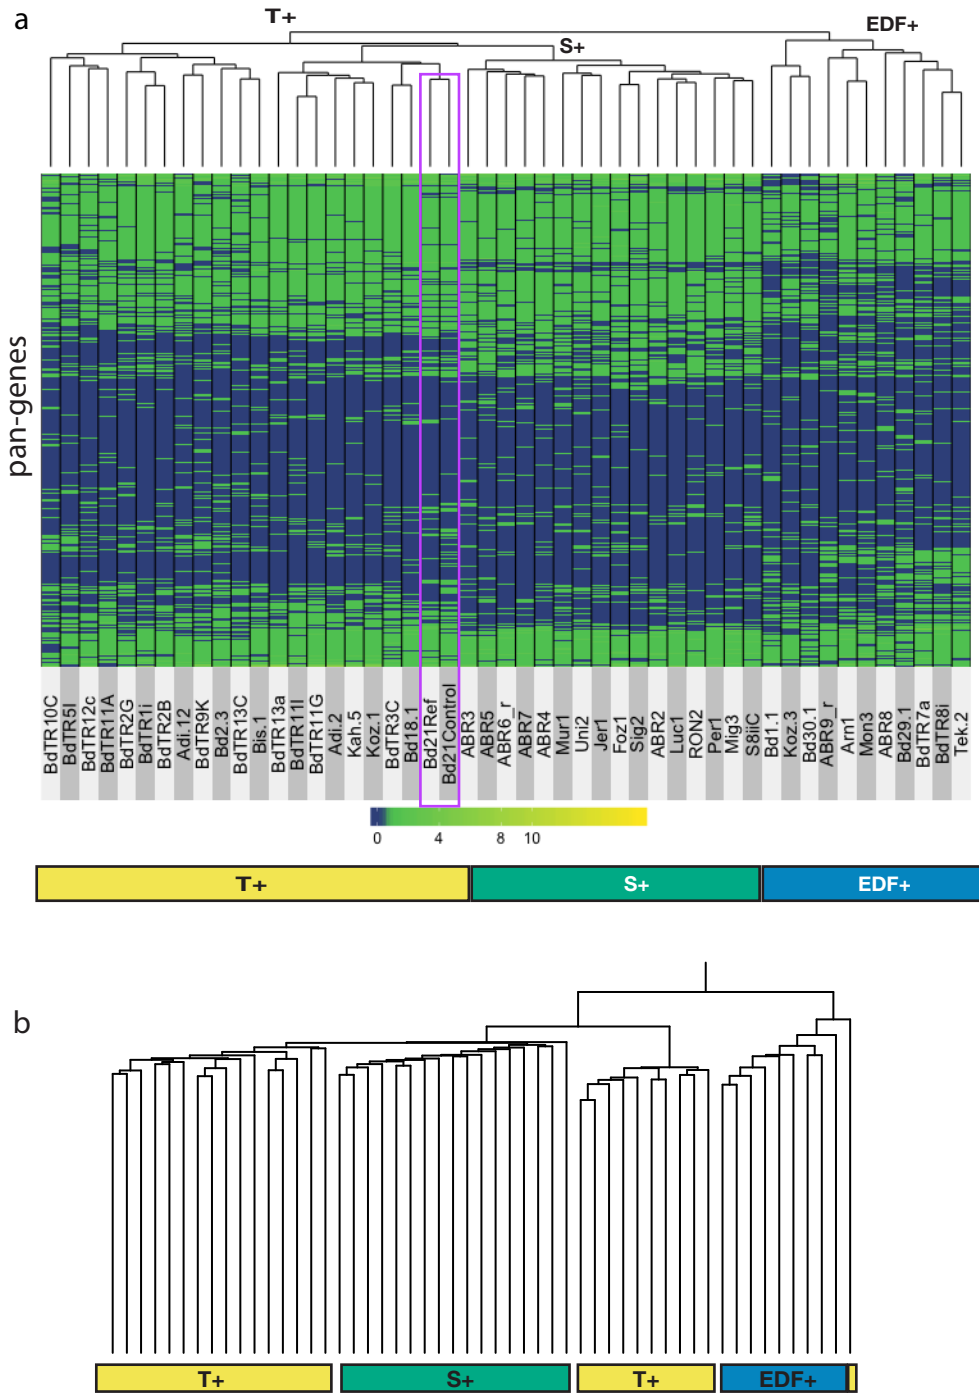

**Supplementary Figure 7.** Copy number and average nucleotide identity recover similar patterns of relatedness as the >3 million SNP-based ML tree. **a**, Lines grouped based on copy numbers for shell pan-genes. Copy number mapping to color scale is show below the plot. **b**, Lines grouped based on average nucleotide identities. Both approaches recovered similar major groupings of lines as STRUCTURE and the >3 million SNP-based ML tree (EDF+, T+ and S+).

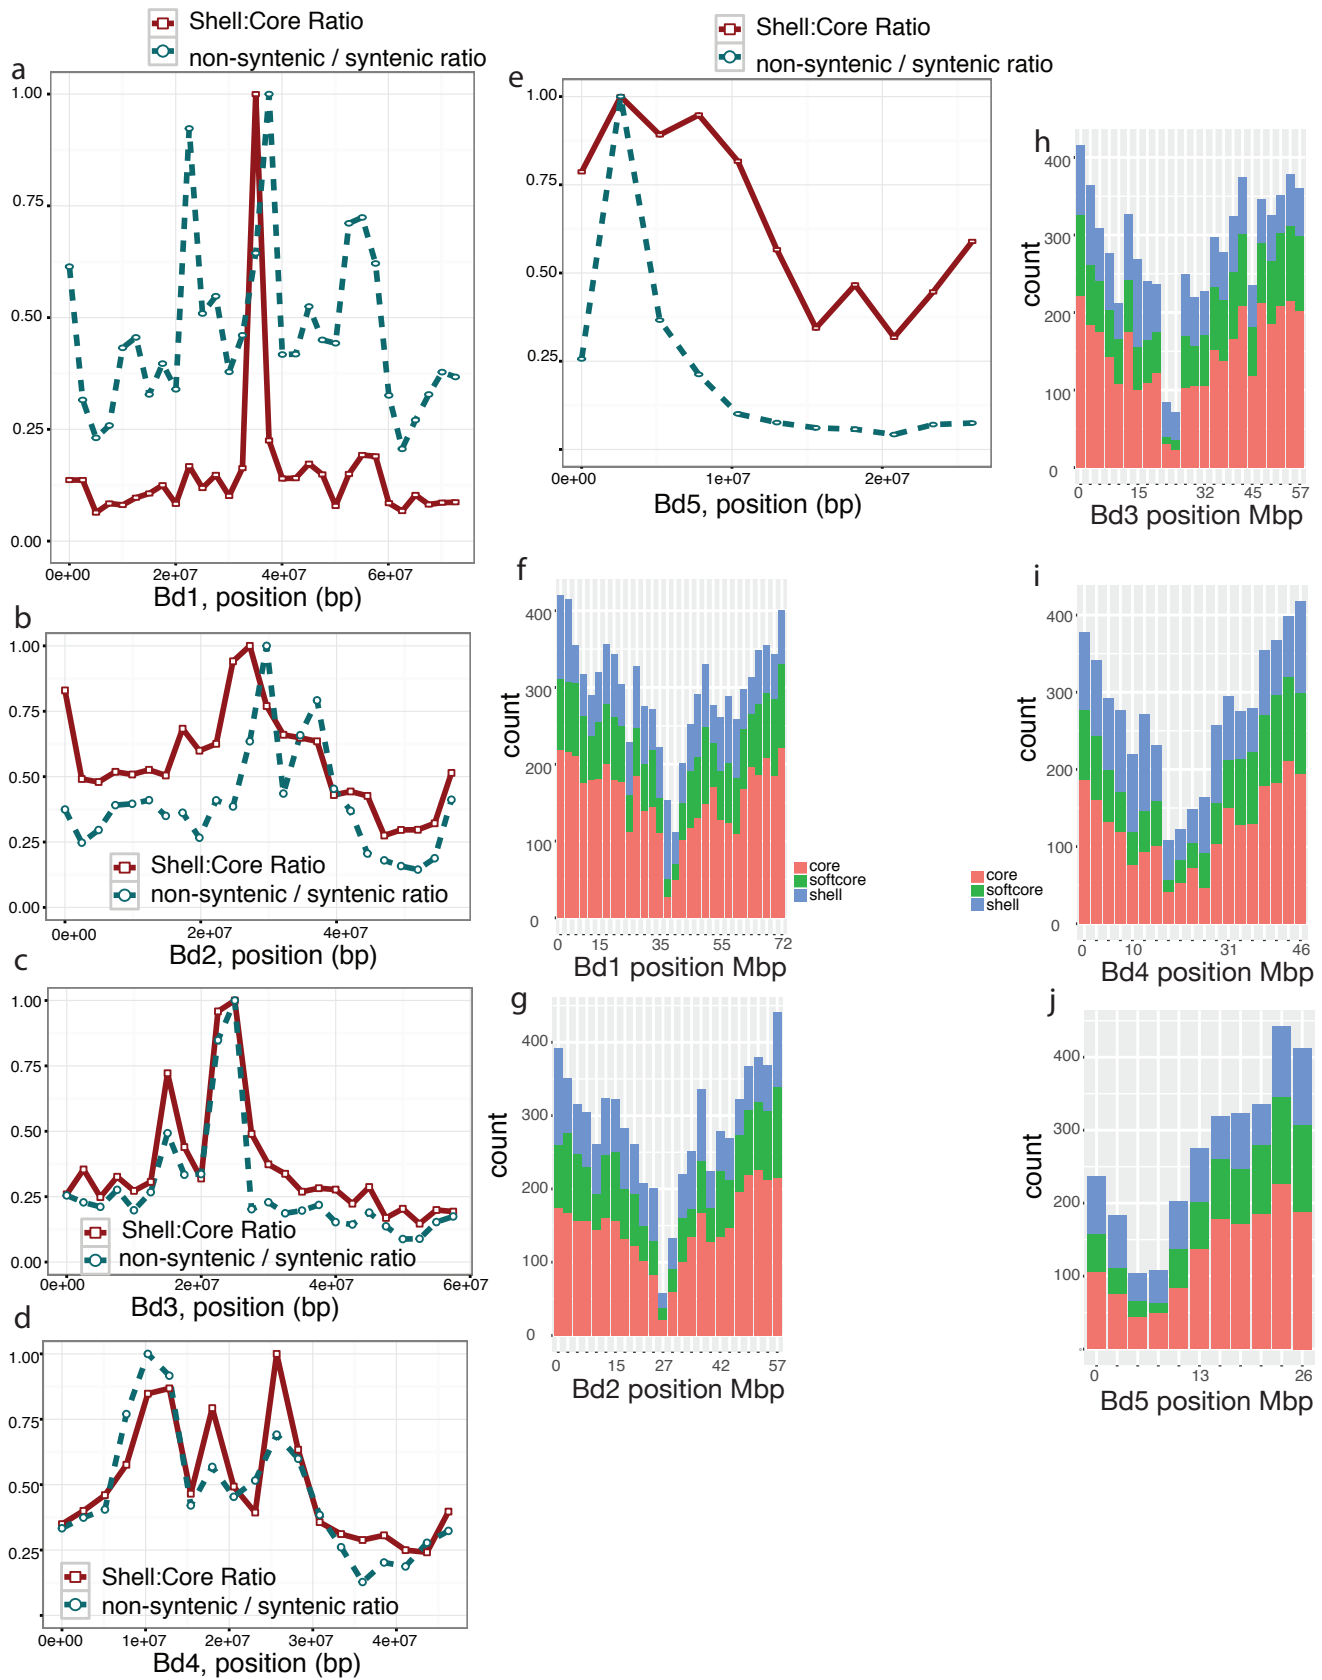

**Supplementary Figure 8.** Ratio of shell genes to core genes is closely correlated with the ratio of non-synonymous to synonymous genes in comparisons of the *B. distachyon* reference genome to the rice genome. Plots of chromosomes Bd1 (a), Bd2 (b), Bd3 (c), Bd4 (d), Bd5 (e). Shell genes are observed throughout the genome, but the ratio of shell genes to core genes is higher in pericentromeric regions of the chromosomes. Plots of core, soft-core and shell genes along chromosomes 1 (Bd1, f), 2 (Bd2, g), 3 (Bd3, h), 4 (Bd4, i) and 5 (Bd5, j).

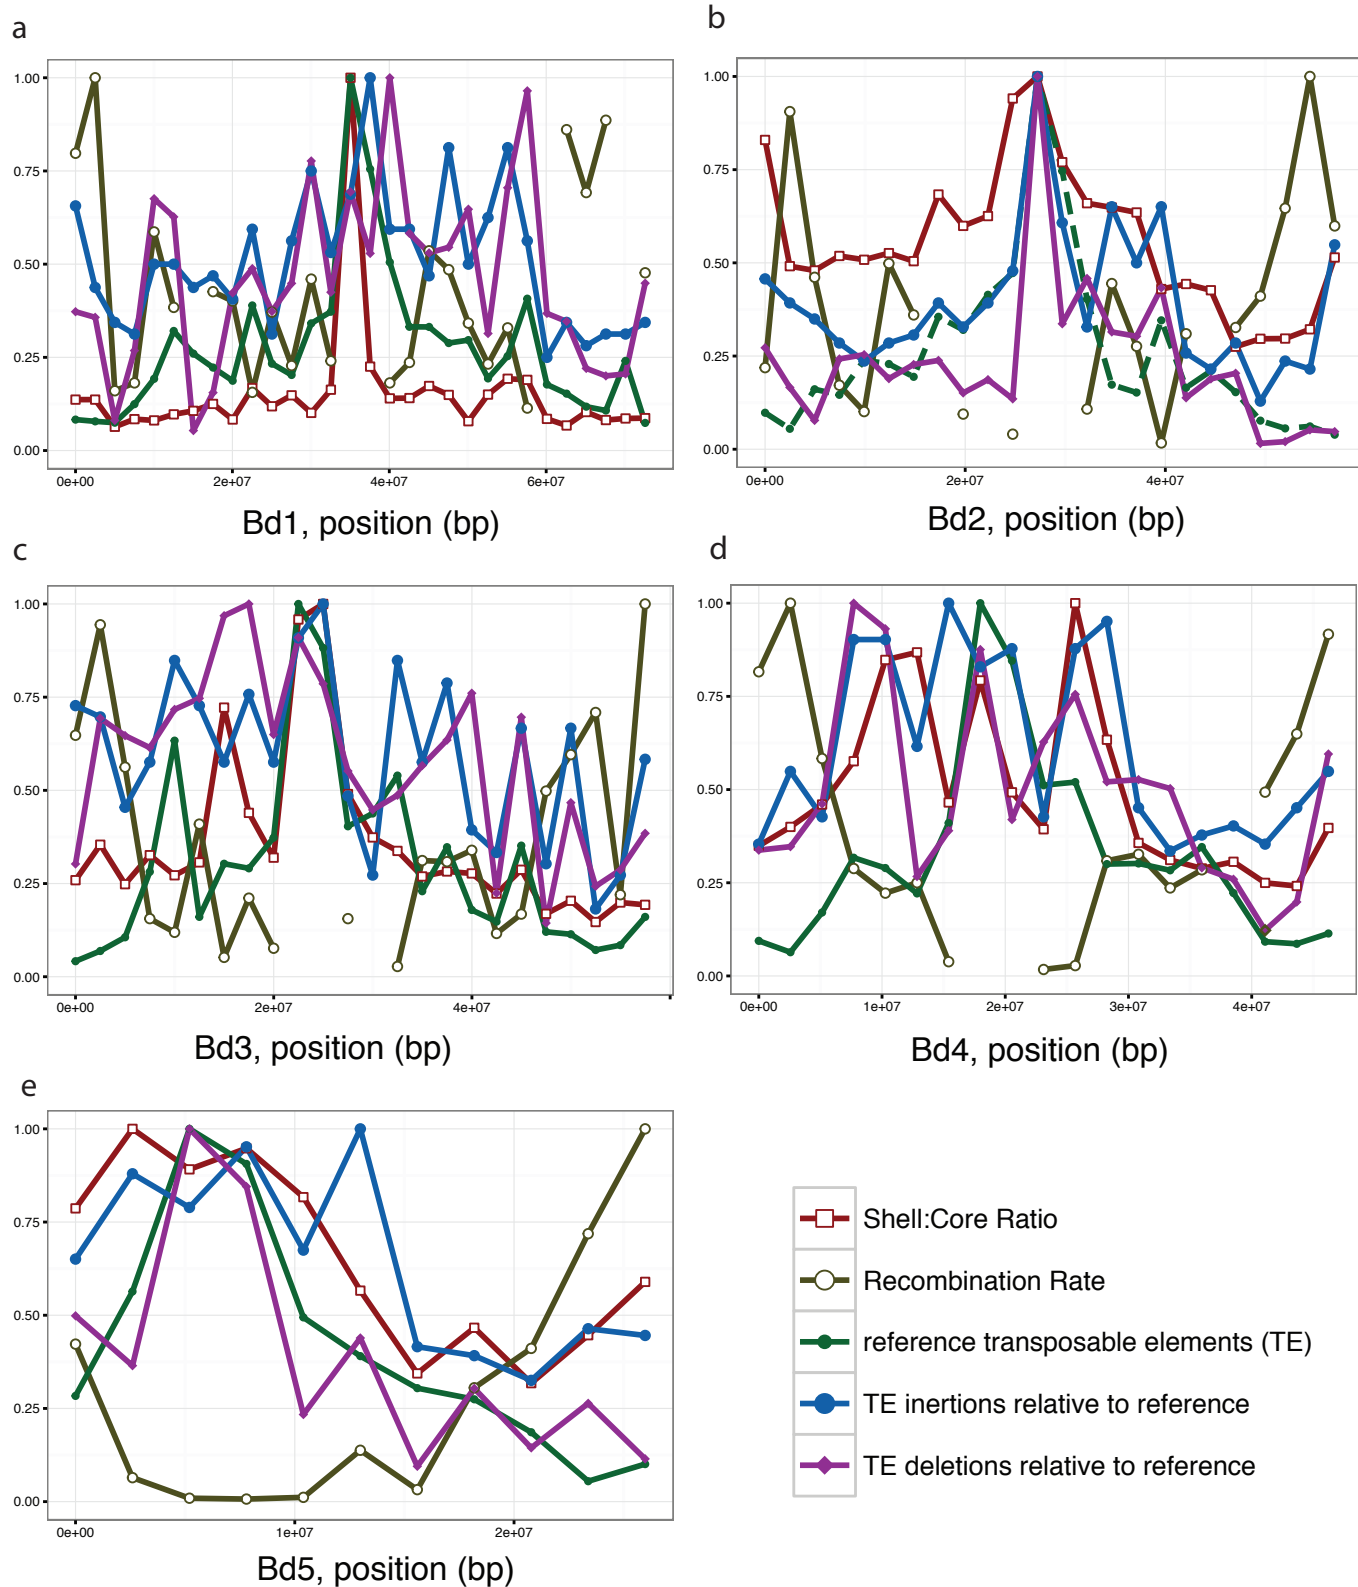

**Supplementary Figure 9. a-e,** Ratio of shell genes to core genes is higher in pericentromeric regions of the chromosomes, which have lower recombination rates, higher concentrations of annotated reference TEs, as well as higher frequency of TE insertion and deletion, relative to the reference genome of *B. distachyon*. Plots along chromosomes Bd1 (a), Bd2 (b), Bd3 (c), Bd4 (d), Bd5 (e). Y-values are scaled for each respective feature to the maximum value for that feature. Data points represent approximately 2.5 Mb bins, adjusted according to chromosome size. TE values are in percent coverage of the interval. Recombination rates are from Huo et al. 2011 Theor. and Appl. Genet. 123: 455-464 after mapping data to the version 2 reference genome assembly.

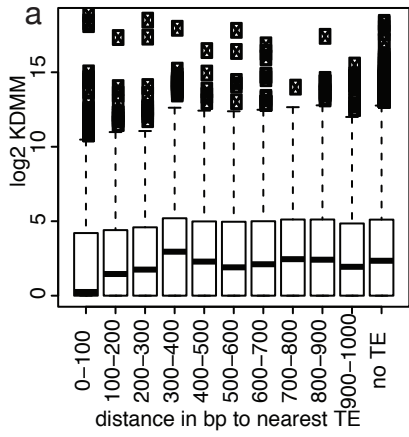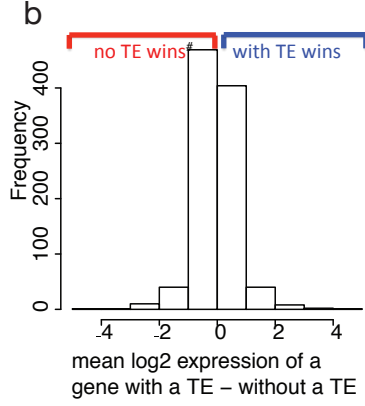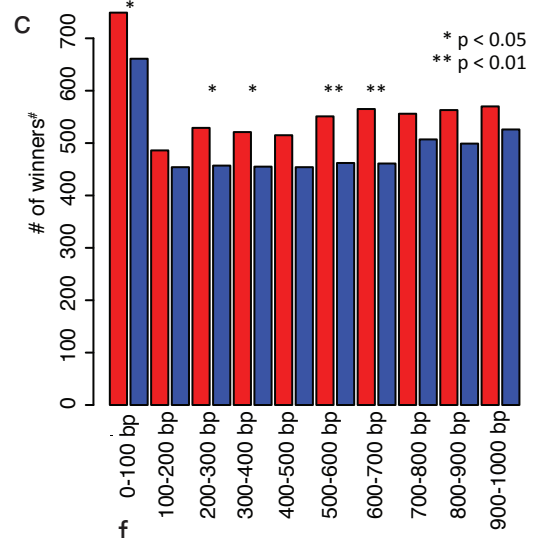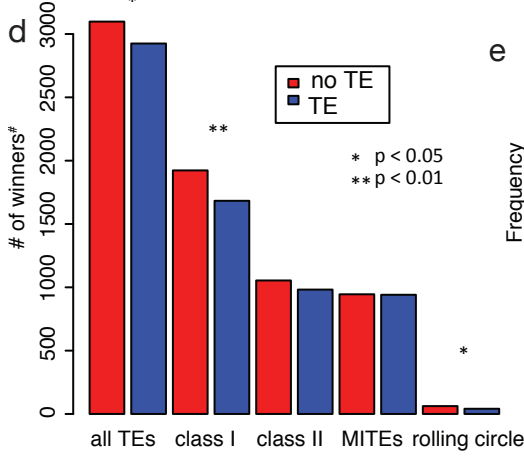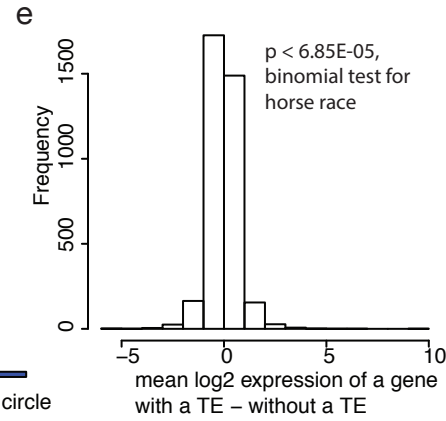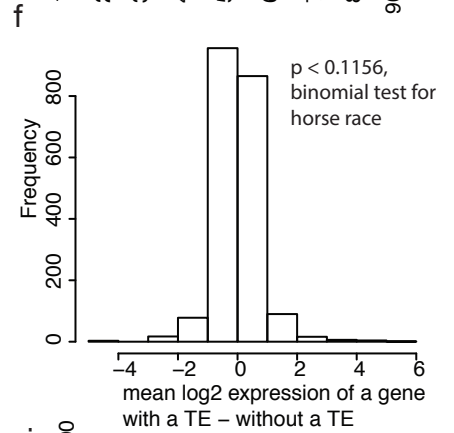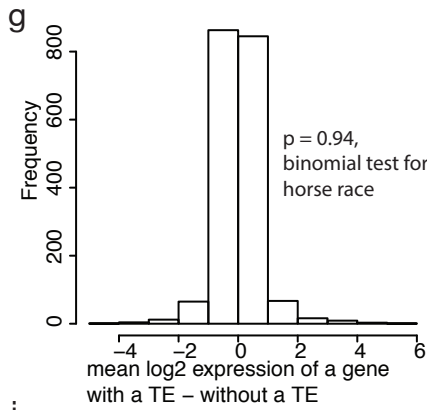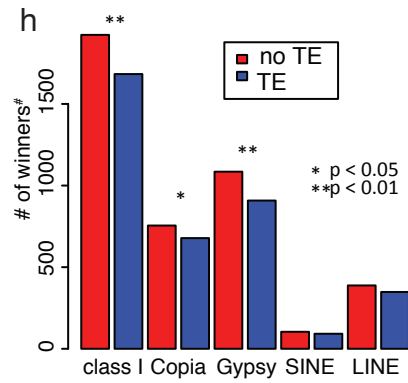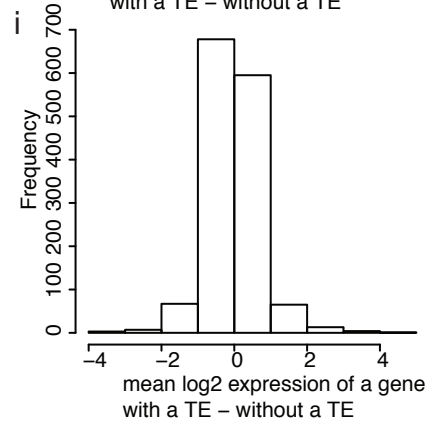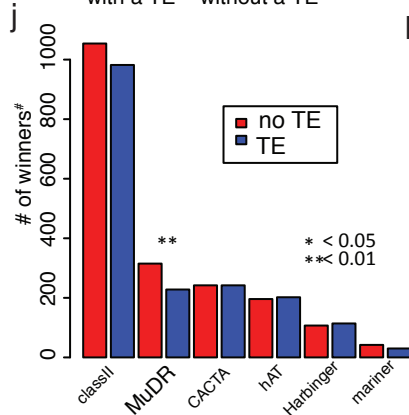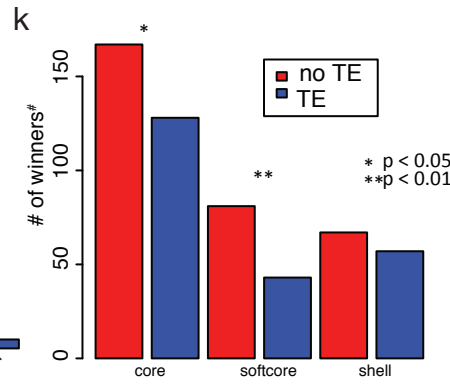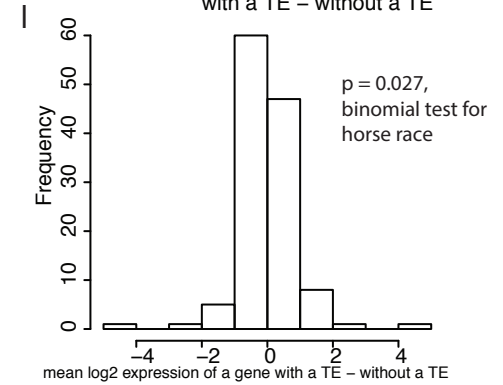

**Supplementary Figure 10.** Among equivalent genes between lines that differ in the presence of an upstream TE, the version lacking a TE tends to be more highly expressed. **a**, Gene expression as a function of distance to upstream TE. **b**, Vertical axis plots the number of winners in horserace comparisons of syntenic genes amongst lines in which one gene has a flanking TE within 300-400 bp upstream and one does not. Horizontal axis plots expression difference between compared syntenic genes. **c**, Horserace results for different TE distance intervals. **d**, Effect of TE class on expression effect. **e-g**, Vertical axis plots the number of winners while horizontal axis plots expression difference between syntenic genes for class 1 TEs (**e**), class 2 TEs (**f**), and MITEs (**g**). **h**, Effect of different types of class 1 TEs on expression. **i**, Vertical axis plots the number of winners while horizontal axis plots expression difference between syntenic genes for Copia TEs. **j**, Number of winners in horserace comparisons, showing the effect of different types of class 2 TEs on expression. **k**, Number of winners in horserace comparisons, showing the effect of MuDR TE on expression of the different pan-genome subsets. **l**, Number of winners plotted over expression difference between the compared genes for MuDR TEs. Gene expression values are in KDMM-normalized counts; KDMM = kernel density mean of M component. Winner = higher expressed gene among lines.

**Supplementary Table 1.** List of *B. distachyon* accessions studied and their associated metadata.

| Accession    | Collection location       | GOLD Biosample ID (JGI) | SRX accession                                    | SRA sample | SRA study | Bioproject  | Biosample    | Elevation (meters) | Latitude          | Longitude         | Reference |
|--------------|---------------------------|-------------------------|--------------------------------------------------|------------|-----------|-------------|--------------|--------------------|-------------------|-------------------|-----------|
| ABR2         | Hérault, France           | Gb0017122               | SRX182920                                        | SRS360668  | SRP001538 | PRJNA32607  | SAMN01162034 | 371                | 43° 36' 15.343" N | 3° 15' 46.580" E  | 1         |
| ABR3         | Aísa, Huesca, Spain       | Gb0017178               | SRX2021046                                       | SRS1615737 | SRP081983 | PRJNA337130 | SAMN05518911 | 1928               | 42° 10' 49.8" N   | 0° 4' 23.2" W     | 1         |
| ABR4         | Arén, Huesca, Spain       | Gb0017179               | SRX2021047                                       | SRS1615738 | SRP081984 | PRJNA337131 | SAMN05519009 | 480                | 42° 15' 45.54" N  | 0° 43' 0.48" E    | 1         |
| ABR5         | Jaca, Huesca, Spain       | Gb0017180               | SRX182894                                        | SRS360645  | SRP001538 | PRJNA32607  | SAMN01161993 | 828                | 42° 34' 23.45" N  | 0° 33' 49.39" W   | 1         |
| ABR6         | Los Arcos, Navarra, Spain | Gb0017181               | SRX298413                                        | SRS438486  | SRP001538 | PRJNA32607  | SAMN02194258 | 484                | 42° 34' 27.48" N  | 2° 11' 5.39" W    | 1         |
| ABR7         | Otero, Valladolid, Spain  | Gb0017232               | SRX2021065                                       | SRS1615752 | SRP081998 | PRJNA337145 | SAMN05519271 | 725                | 41° 35' 23.86" N  | 4° 45' 24.26" W   | 1         |
| ABR8         | Siena, Italy              | Gb0017233               | SRX874557<br>SRX874558                           | SRS844147  | SRP054525 | PRJNA258992 | SAMN03003516 | 272                | 43° 18' 52.423" N | 11° 19' 10.902" E | 1         |
| ABR9         | Ljubjana, Croatia         |                         | SRX182919                                        | SRS360667  | SRP001538 | PRJNA32607  | SAMN01162033 |                    |                   |                   | 1         |
| Adi-2        | Adiyaman, Turkey          | Gb0017235               | SRX2020496                                       | SRS1615344 | SRP081832 | PRJNA337146 | SAMN05519211 | 510                | 37° 46' 14.5" N   | 38° 21' 8.2" E    | 2         |
| Adi10        | Adiyaman, Turkey          | Gb0009975               | SRX185151                                        | SRS361658  | SRP001538 | PRJNA32607  | SAMN01163552 | 510                | 37° 46' 14.5" N   | 38° 21' 8.2" E    | 2         |
| Adi-12       | Adiyaman, Turkey          | Gb0009864               | SRX2020035                                       | SRS1615304 | SRP081813 | PRJNA337348 | SAMN05519184 | 510                | 37° 46' 14.5" N   | 38° 21' 8.2" E    | 2         |
| Arn1         | Arén, Huesca, Spain       | Gb0009976               | SRX298355                                        | SRS438433  | SRP024421 | PRJNA249894 | SAMN02194211 | 681                | 42° 15' 23.44" N  | 0° 43' 47.46" E   | 2         |
| Bd1-1        | Soma, Manisa, Turkey      | Gp0001144               | SRX060134<br>SRX060135<br>SRX060136<br>SRX116611 | SRS190935  | SRP001538 | PRJNA32607  | SAMN00262772 | 141                | 39° 11' 27.44" N  | 27° 36' 28.59" E  | 3         |
| Bd2-3        | Iraq                      | Gb0009943               | SRX2020036                                       | SRS1615305 | SRP081814 | PRJNA337363 | SAMN05519268 | 42                 | 33° 45' 39.18" N  | 44° 24' 11.07" E  | 3         |
| Bd3-1        | Iraq                      | Gp0001284               | SRX117923                                        | SRP001538  | SRP001538 | PRJNA32607  | SAMN00779234 | 42                 | 33° 45' 39.18" N  | 44° 24' 11.07" E  | 3         |
| Bd18-1       | Kaman, Kırşehir, Turkey   | Gb0009918               | SRX2020043,<br>SRX2020044                        | SRS1615310 | SRP081819 | PRJNA337356 | SAMN05518944 | 1101               | 39° 22' 4.25" N   | 33° 43' 48.91" E  | 3         |
| Bd21 Control | near Salakudin, Iraq      | Gb0012676               | SRX2020505,<br>SRX2020506                        | SRS1615350 | SRP081838 | PRJNA337420 | SAMN05519133 | 42                 | 33° 45' 39.18" N  | 44° 24' 11.07" E  | 3         |

|         |                          |           |                                                  |                        |           |             |                              |      |                                |                  |   |
|---------|--------------------------|-----------|--------------------------------------------------|------------------------|-----------|-------------|------------------------------|------|--------------------------------|------------------|---|
| Bd21-3  | nar Salakudin,<br>Iraq   | Gp0039861 | SRX119501<br>SRX146215                           | SRS291714<br>SRS312328 | SRP010886 | PRJNA250376 | SAMN00788671<br>SAMN00991142 | 42   | 33° 45' 39.18" N               | 44° 24' 11.07" E | 4 |
| Bd29-1  | Krym, Ukraine            |           |                                                  |                        |           | PRJNA32607  | SAMN07835970                 | 260  | 44° 30' 55" N                  | 33° 33' 23" E    | 3 |
| Bd30-1  | Dílar, Granada,<br>Spain | Gp0001821 | SRX116649<br>SRX059915                           | SRS190910              | SRP001538 | PRJNA32607  | SAMN00262727                 | 1220 | 36° 59' 25.76" N               | 3° 33' 31.44" W  | 5 |
| BdTR1I  | Aydin, Turkey            | Gb0017239 | SRX183383                                        | SRS360859              | SRP001538 | PRJNA32607  | SAMN01162198                 | 841  | 38° 5' 35.03" N                | 28° 34' 59.02" E | 6 |
| BdTR2B  | Turkey                   | Gb0012677 | SRX2020498,<br>SRX2020499                        | SRS1615346             | SRP081834 | PRJNA337421 | SAMN05518874                 | 667  | 40° 4' 55.55" N                | 31° 19' 52.01" E | 6 |
| BdTR2G  | Ankara, Turkey           | Gb0009917 | SRX185148                                        | SRS361655              | SRP001538 | PRJNA32607  | SAMN01163549                 | 1596 | 40° 23' 37.13" N               | 32° 59' 7.32" E  | 6 |
| BdTR3C  | Turkey                   | Gb0009942 | SRX2020033                                       | SRS1615302             | SRP081811 | PRJNA337362 | SAMN05519130                 | 1957 | 36° 46' 58.92" N               | 32° 57' 46.71" E | 6 |
| BdTR5I  | Turkey                   | Gb0009974 | SRX2020021                                       | SRS1615296             | SRP081805 | PRJNA337382 | SAMN05518814                 | 1596 | 40° 23' 37.13" N               | 32° 59' 7.32" E  | 6 |
| BdTR7A  | Yozgat, Turkey           | Gb0017240 | SRX183377                                        | SRS360854              | SRP001538 | PRJNA32607  | SAMN01162193                 | 1035 | 39° 44' 53.45" N               | 34° 39' 1.15" E  | 6 |
| BdTR8I  | Turkey                   | Gb0017241 | SRX181206<br>SRX181207<br>SRX181208<br>SRX181209 | SRS359840              | SRP001538 | PRJNA32607  | SAMN01137370                 | 2385 | 37° 6' 31.87" N                | 34° 4' 17.06" E  | 6 |
| BdTR9K  | Eskişehir, Turkey        | Gb0009919 | SRX2020011                                       | SRS1615290             | SRP081799 | PRJNA337357 | SAMN05518772                 | 932  | 39° 45' 10.62" N               | 30° 47' 19.07" E | 6 |
| BdTR10C | Turkey                   | Gb0009946 | SRX185149                                        | SRS361656              | SRP001538 | PRJNA32607  | SAMN01163550                 | 1288 | 37° 46' 41.64" N <sup>16</sup> | 31° 53' 5.68" E  | 6 |
| BdTR11A | Turkey                   | Gb0017236 | SRX2020493                                       | SRS1615342             | SRP081830 | PRJNA337147 | SAMN05518768                 | 986  | 38° 25' 0.42" N                | 28° 1' 52.75" E  | 6 |
| BdTR11G | Kirklareli,<br>Turkey    | Gb0017237 | SRX2020507                                       | SRS1615351             | SRP081839 | PRJNA337148 | SAMN05518884                 | 124  | 41° 25' 17.86" N               | 27° 28' 36.81" E | 6 |
| BdTR11I | Turkey                   | Gb0009945 | SRX2020031,<br>SRX2020032                        | SRS1615301             | SRP081810 | PRJNA337374 | SAMN05519029                 | 363  | 39° 44' 17.39" N               | 28° 2' 24.71" E  | 6 |
| BdTR12C | Turkey                   | Gp0009928 | SRX059779<br>SRX059780                           | SRS190847              | SRP001538 | PRJNA32607  | SAMN00262664                 | 1035 | 39° 44' 53.45" N               | 34° 39' 1.15" E  | 6 |
| BdTR13A | Ankara, Turkey           | Gb0017238 | SRX183318                                        | SRS360828              | SRP001538 | PRJNA32607  | SAMN01162158                 | 787  | 39° 45' 23.35" N               | 32° 25' 56.46" E | 6 |
| BdTR13C | Ankara, Turkey           | Gb0009863 | SRX2020018                                       | SRS1615294             | SRP081803 | PRJNA337347 | SAMN05519253                 | 1192 | 39° 24' 46.28" N               | 32° 59' 17.24" E | 6 |



|       |                                                                         |                                              |                                          |            |           |             |              |     |                  |                 |   |
|-------|-------------------------------------------------------------------------|----------------------------------------------|------------------------------------------|------------|-----------|-------------|--------------|-----|------------------|-----------------|---|
| Bis1  | Bismil, Turkey                                                          | Gp0017242                                    | SRX2020040,<br>SRX2020041,<br>SRX2020042 | SRS1615309 | SRP081818 | PRJNA337153 | SAMN05518825 | 529 | 37° 52' 35.6" N  | 41° 0' 54.3" E  | 2 |
| Foz1  | Foz de Lumbier,<br>Navarra, Spain                                       | Gp0009893<br>(Mig1)<br>Project ID:<br>404167 | SRX2020038                               | SRS1615307 | SRP081816 | PRJNA337349 | SAMN05518738 | 434 | 42° 38' 11.44" N | 1° 18' 17.42" W | 7 |
| Gaz8  | Gaziantep,<br>Turkey                                                    | Gb0009947                                    | SRX185147                                | SRS361654  | SRP001538 | PRJNA32607  | SAMN01163548 | 891 | 37° 7' 39.8" N   | 37° 23' 26.9" E | 2 |
| Jer1  | Ermita de San<br>Jerónimo,<br>Perañeta,<br>Huesca, Spain                | Gp0009916<br>(Mon1)<br>Project ID:<br>404166 | SRX2020045                               | SRS1615311 | SRP081820 | PRJNA337354 | SAMN05519060 | 418 | 42° 3' 16.56" N  | 0° 0' 44.57" W  | 7 |
| Kah-1 | Kahta, Turkey                                                           | Gp0017374                                    | SRX2020494,<br>SRX2020495                | SRS1615343 | SRP081831 | PRJNA337155 | SAMN05519273 | 665 | 37° 44' 2.3" N   | 38° 32' 0.2" E  | 2 |
| Kah-5 | Kahta, Turkey                                                           | Gb0017182                                    | SRX2020497                               | SRS1615345 | SRP081833 | PRJNA337133 | SAMN05519229 | 665 | 37° 44' 2.3" N   | 38° 32' 0.2" E  | 2 |
| Koz-1 | Kozluk, Turkey                                                          | Gb0012678                                    | SRX183517                                | SRS360986  | SRP001538 | PRJNA32607  | SAMN01162329 | 853 | 38° 9' 8.2.6" N  | 41° 36' 34.8" E | 2 |
| Koz-3 | Kozluk, Turkey                                                          | Gp0009991                                    | SRX059781<br>SRX059782                   | SRS190848  | SRP001538 | PRJNA32607  | SAMN00262665 | 853 | 38° 9' 8.2.6" N  | 41° 36' 34.8" E | 2 |
| Luc1  | Ermita de Santa<br>Lucía, Berdún,<br>Huesca, Spain                      | Gp0017244                                    | SRX1869528                               | SRS1520207 | SRP076899 | PRJNA249901 | SAMN02821630 | 597 | 42° 36' 36.18" N | 0° 53' 35.48" W | 7 |
| Mig3  | San Miguel de<br>Foces, Ibieca,<br>Huesca, Spain                        | Gb0017183                                    | SRX182705                                | SRS360564  | SRP001538 | PRJNA32607  | SAMN01161923 | 572 | 42° 8' 52.76" N  | 0° 11' 41.89" W | 7 |
| Mon3  | Puerto de<br>Pallaruelo,<br>Castejón de<br>Monegros.<br>Zaragoza, Spain | Gb0017184                                    | SRX182916                                | SRS360665  | SRP001538 | PRJNA32607  | SAMN01162031 | 515 | 41° 39' 4.75" N  | 0° 12' 37.51" W | 7 |
| Mur1  | Castillo de Mur,<br>Lleida, Spain                                       | Gb0009944                                    | SRX181229                                | SRS359860  | SRP001538 | PRJNA32607  | SAMN01137389 | 487 | 42° 06' 18" N    | 0° 51' 23" E    | 7 |
| Per1  | Puerto del<br>Perdón, Navarra,<br>Spain                                 | Gp0017243                                    | SRX1869283                               | SRS1520047 | SRP076878 | PRJNA249907 | SAMN02947395 | 742 | 42° 44' 13.34" N | 1° 44' 58.6" W  | 7 |
| Ron2  | Roncal, Navarra,<br>Spain                                               | Gp0039823                                    | SRX711596                                | SRS710321  | SRP047542 | PRJNA251304 | SAMN02821496 | 594 | 42° 46' 50" N    | 0° 57' 48" W    | 7 |

|       |                                             |                                              |                           |            |           |             |              |     |                  |                 |   |
|-------|---------------------------------------------|----------------------------------------------|---------------------------|------------|-----------|-------------|--------------|-----|------------------|-----------------|---|
| S8iiC | Zaidín, Huesca, Spain                       | Gb0017185                                    | SRX2021637                | SRS1616272 | SRP082068 | PRJNA337136 | SAMN05519170 | 144 | 41° 36' 19.3" N  | 0° 08' 38.4" E  | 8 |
| Sig2  | Sigüés, Zaragoza, Spain                     | Gp0009900<br>(Sig1)<br>Project ID:<br>404169 | SRX2020046                | SRS1615312 | SRP081821 | PRJNA337350 | SAMN05518942 | 524 | 42° 36' 46.55" N | 1° 0' 52.38" W  | 7 |
| Tek-2 | Tekirdag, Turkey                            | Gb0012679                                    | SRX183516                 | SRS360985  | SRP001538 | PRJNA32607  | SAMN01162328 | 20  | 41° 0' 40.1" N   | 27° 31' 8.8" E  | 2 |
| Tek-4 | Tekirdag, Turkey                            | Gb0017188                                    | SRX2020048,<br>SRX2020047 | SRS1615313 | SRP081822 | PRJNA337137 | SAMN05519158 | 20  | 41° 0' 40.1" N   | 27° 31' 8.8" E  | 2 |
| Uni2  | Escuela Politécnica Superior, Huesca, Spain | Gb0017189                                    | SRX2021048                | SRS1615739 | SRP081985 | PRJNA337138 | SAMN05519210 | 480 | 42° 7' 3.98" N   | 0° 26' 42.81" W | 7 |

**Supplementary Table 2.** Completeness Information for Individual Genome Assemblies.

| inbred line | N50       | CEGMA complete % | CEGMA partial % | primary transcripts | assembled genome size | BUSCO complete % |
|-------------|-----------|------------------|-----------------|---------------------|-----------------------|------------------|
| ABR2        | 46,617    | 94.76%           | 99.60%          | 32,811              | 270,545,830           | 97.5             |
| ABR3        | 42,279    | 94.76%           | 99.60%          | 32,745              | 270,765,173           | 97.4             |
| ABR4        | 49,653    | 94.35%           | 99.60%          | 32,389              | 267,583,885           | 97.2             |
| ABR5        | 25,833    | 93.95%           | 99.60%          | 33,015              | 271,290,787           | 96.4             |
| ABR6        | 38,433    | 95.16%           | 99.60%          | 32,449              | 283,715,612           | 97.9             |
| ABR7        | 65,179    | 94.76%           | 99.60%          | 32,484              | 268,621,971           | 98.1             |
| ABR8        | NA        | 91.13%           | 97.98%          | 32,609              | 295,546,211           | 91.4             |
| ABR9        | 57,868    | 95.16%           | 99.60%          | 29,649              | 273,963,599           | 96.8             |
| Adi-10*     | 11,729    | 89.52%           | 98.39%          | 30,256              | 266,359,318           | 84.8             |
| Adi-12      | 20,743    | 94.35%           | 99.19%          | 32,124              | 268,829,923           | 95.7             |
| Adi-2       | 45,772    | 93.55%           | 99.19%          | 32,686              | 272,155,479           | 97.6             |
| Arn1        | 84,176    | 95.97%           | 99.60%          | 32,269              | 267,544,414           | 97.9             |
| Bd1-1       | 61,944    | 91.94%           | 97.18%          | 29,784              | 183,480,184           | 96.1             |
| Bd18-1      | 1,027,801 | 95.56%           | 99.60%          | 32,403              | 269,291,862           | 98.4             |
| Bd2-3       | 19,889    | 94.35%           | 99.60%          | 32,274              | 268,615,379           | 95.4             |
| Bd21-3      | 162,708   | 95.16%           | 99.60%          | 31,970              | 243,777,234           | 96.7             |
| Bd21Control | 30,986    | 93.55%           | 98.79%          | 32,654              | 269,143,897           | 97.1             |
| Bd29-1      | 14,197    | 92.34%           | 99.19%          | 31,613              | 253,064,284           | 93.6             |
| Bd3-1*      | 80,194    | 89.52%           | 96.77%          | 25,845              | 170,261,895           | 85.6             |
| Bd30-1      | 74,059    | 93.95%           | 98.79%          | 29,862              | 194,942,870           | 96.1             |
| BdTR10C     | 15,470    | 93.55%           | 99.60%          | 31,500              | 268,286,720           | 93.2             |
| BdTR11A     | 20,158    | 94.76%           | 98.79%          | 36,496              | 266,599,951           | 95.9             |
| BdTR11G     | 45,335    | 95.16%           | 99.60%          | 32,867              | 272,988,239           | 97.6             |
| BdTR11I     | 31,679    | 94.35%           | 99.60%          | 32,391              | 269,670,491           | 97.4             |
| BdTR12c     | 15,138    | 93.95%           | 99.60%          | 31,960              | 247,594,554           | 94.8             |
| BdTR13a     | 79,173    | 94.76%           | 99.60%          | 32,911              | 278,373,463           | 97.8             |
| BdTR13C     | 18,488    | 93.15%           | 99.60%          | 32,282              | 267,610,339           | 95.1             |
| BdTR1i      | 80,453    | 95.56%           | 99.60%          | 32,493              | 272,007,662           | 97.8             |
| BdTR2B      | 28,026    | 94.76%           | 99.60%          | 32,239              | 269,783,561           | 96.7             |
| BdTR2G      | 16,372    | 93.15%           | 98.79%          | 32,220              | 276,420,628           | 95.3             |
| BdTR3C      | 417,778   | 95.56%           | 99.60%          | 32,336              | 263,477,856           | 97.9             |
| BdTR5I      | 18,466    | 93.55%           | 99.19%          | 31,706              | 244,059,037           | 94.1             |
| BdTR7a      | 46,933    | 94.35%           | 99.19%          | 32,266              | 270,408,172           | 97.3             |
| BdTR8i      | 189,637   | 95.56%           | 98.79%          | 31,490              | 240,511,726           | 97.2             |
| BdTR9K      | 15,934    | 93.95%           | 99.19%          | 32,193              | 269,356,293           | 94.6             |
| Bis-1       | 24,103    | 94.35%           | 99.60%          | 32,559              | 269,200,960           | 96.9             |
| Foz1        | 24,769    | 94.35%           | 99.19%          | 33,021              | 268,547,559           | 96.8             |
| Gaz-8*      | 6,834     | 88.31%           | 98.39%          | 26,942              | 251,808,632           | 75               |
| Jer1        | 22,190    | 94.76%           | 99.60%          | 32,793              | 264,870,977           | 96.5             |
| Kah-1*      | 11,782    | 88.71%           | 97.98%          | 33,710              | 272,262,902           | 86.5             |
| Kah-5       | 42,621    | 94.35%           | 99.19%          | 32,643              | 271,867,266           | 97.8             |

|                                                                                    |           |        |        |        |             |      |
|------------------------------------------------------------------------------------|-----------|--------|--------|--------|-------------|------|
| Koz-1                                                                              | 49,778    | 94.76% | 99.60% | 32,750 | 273,312,229 | 98.3 |
| Koz-3                                                                              | 54,483    | 91.53% | 97.18% | 29,450 | 187,169,235 | 95.6 |
| Luc1                                                                               | 69,053    | 94.76% | 99.60% | 32,340 | 264,910,967 | 97.9 |
| Mig3                                                                               | 38,249    | 95.16% | 99.60% | 32,473 | 266,133,985 | 97.5 |
| Mon3                                                                               | 29,829    | 94.76% | 99.60% | 32,655 | 269,626,778 | 96.6 |
| Mur1                                                                               | 21,765    | 93.95% | 99.19% | 32,580 | 255,925,227 | 96.2 |
| Per1                                                                               | 53,920    | 94.76% | 99.60% | 32,471 | 265,733,466 | 97.7 |
| RON2                                                                               | 70,849    | 94.76% | 99.60% | 32,266 | 270,982,226 | 97.6 |
| S8iiC                                                                              | 38,176    | 94.35% | 99.19% | 32,483 | 262,554,615 | 97.5 |
| Sig2                                                                               | 21,539    | 94.76% | 99.60% | 33,075 | 268,379,077 | 96.8 |
| Tek-2                                                                              | 27,391    | 94.35% | 99.19% | 31,701 | 239,806,349 | 96.7 |
| Tek-4*                                                                             | 5,039     | 77.82% | 94.76% | 34,495 | 210,374,793 | 75.1 |
| Uni2                                                                               | 19,865    | 94.35% | 99.60% | 32,441 | 268,147,538 | 97.5 |
| version 1<br>sanger<br><i>B. distachyon</i><br>reference                           | 426,629   | 95.56% | 99.60% | 25,532 |             |      |
| version 2<br>sanger<br><i>B. distachyon</i><br>reference                           | 6,404,379 | 95.56% | 99.60% | 31,694 |             | 98.3 |
| version 2<br>sanger<br><i>B. distachyon</i><br>reference,<br>annotation<br>control |           |        |        | 32,712 |             | 98.1 |
| Oropetium<br>thomaeum<br>(v1.0)                                                    |           |        |        |        |             | 70.2 |
| Carica papaya<br>(ASGPB v0.4<br>Dec 2)                                             |           |        |        |        |             | 72   |
| Brassica<br>oleracea<br>capitata (v1.0)                                            |           |        |        |        |             | 78.4 |
| Arabidopsis<br>halleri (v1.1)                                                      |           |        |        |        |             | 85.9 |
| Zea mays<br>(v3.0)                                                                 |           |        |        |        |             | 92.2 |
| Oryza sativa<br>(MSU v7.0)                                                         |           |        |        |        |             | 95.6 |
| Setaria viridis<br>(v1.1)                                                          |           |        |        |        |             | 97.5 |
| Sorghum<br>bicolor<br>(v3.1.1)                                                     |           |        |        |        |             | 98.3 |

|                                         |  |  |  |  |  |      |
|-----------------------------------------|--|--|--|--|--|------|
| Setaria italica (v2.2)                  |  |  |  |  |  | 98.4 |
| Brachypodium stacei (v1.1)              |  |  |  |  |  | 98.6 |
| Brachypodium distachyon (v3.1)          |  |  |  |  |  | 98.6 |
| Oryza sativa Kitaake (v2.1)             |  |  |  |  |  | 98.8 |
| Prunus persica (v2.1)                   |  |  |  |  |  | 98.8 |
| Arabidopsis thaliana columbia (TAIR 10) |  |  |  |  |  | 99.3 |

\* = not used in TE or non-coding analyses due to incomplete assembly

**Supplementary Table 3.** Percentage of membership of lines to each of the optimal K=3 genetic groups (EDF+, T+, S+) inferred from STRUCTURE analysis of >3 million SNP data. Accessions with significant admixed genetic profiles (showing percentage of membership <95% to its main population-group) are highlighted in bold.

| Accession     | EDF+         | T+           | S+           |
|---------------|--------------|--------------|--------------|
| Bd1-1         | 1            | 0            | 0            |
| Bd29-1        | 1            | 0            | 0            |
| ABR9          | 1            | 0            | 0            |
| BdTR7a        | 1            | 0            | 0            |
| BdTR8i        | 1            | 0            | 0            |
| Tek-2         | 1            | 0            | 0            |
| Tek-4         | 1            | 0            | 0            |
| <b>Arn1</b>   | <b>0.819</b> | 0            | <b>0.181</b> |
| <b>Mon3</b>   | <b>0.843</b> | 0            | <b>0.157</b> |
| <b>Bd21</b>   | <b>0.155</b> | <b>0.845</b> | 0            |
| <b>Bd21-3</b> | <b>0.113</b> | <b>0.887</b> | 0            |
| <b>Bd2-3</b>  | <b>0.07</b>  | <b>0.93</b>  | 0            |
| Bd3-1         | 0.044        | 0.95         | 0.006        |
| Adi-2         | 0            | 1            | 0            |
| Adi-10        | 0            | 0.983        | 0.017        |
| Adi-12        | 0            | 1            | 0            |
| Kah-1         | 0            | 1            | 0            |
| Kah-5         | 0            | 1            | 0            |
| Koz-1         | 0            | 1            | 0            |
| Koz-3         | 0            | 0.964        | 0.036        |
| Gaz-8         | 0            | 1            | 0            |
| BdTR1i        | 0            | 1            | 0            |
| BdTR2b        | 0            | 1            | 0            |
| BdTR2g        | 0            | 1            | 0            |
| BdTR3c        | 0            | 1            | 0            |
| BdTR5i        | 0            | 1            | 0            |
| BdTR9k        | 0            | 1            | 0            |
| BdTR10c       | 0            | 0.956        | 0.044        |
| BdTR11a       | 0            | 1            | 0            |
| BdTR11g       | 0            | 1            | 0            |
| BdTR11i       | 0            | 1            | 0            |
| BdTR12c       | 0            | 0.984        | 0.016        |
| BdTR13a       | 0            | 1            | 0            |
| BdTR13c       | 0            | 1            | 0            |
| <b>Bd18-1</b> | <b>0.052</b> | <b>0.819</b> | <b>0.129</b> |
| ABR2          | 0            | 0.002        | 0.998        |
| ABR3          | 0            | 0            | 1            |
| ABR4          | 0            | 0            | 1            |
| ABR5          | 0            | 0            | 1            |
| ABR6          | 0            | 0            | 1            |
| ABR7          | 0            | 0.039        | 0.961        |
| RON2          | 0            | 0            | 1            |
| Per1          | 0            | 0            | 1            |
| Luc1          | 0            | 0            | 1            |
| Bd30-1        | 0            | 0.024        | 0.976        |
| Jer1          | 0            | 0            | 1            |
| Foz1          | 0            | 0            | 1            |
| Sig2          | 0            | 0            | 1            |
| Mur1          | 0            | 0            | 1            |
| Bis-1         | 0            | 1            | 0            |
| Mig3          | 0            | 0.003        | 0.997        |
| Uni2          | 0.003        | 0.019        | 0.979        |
| S8iiC         | 0            | 0            | 1            |

**Supplementary Table 4.** List of 25 flowering time traits, latitude and related molecular characters analyzed in 53 lines of *B. distachyon*. Trait number, trait abbreviation and description, number of trait states, and character states are indicated for each trait. All traits have been recorded as discrete (multistate) or binary characters. Traits Tr7-Tr25 correspond to polymorphisms in the flowering genes at the indicated positions. Color codes correspond to the colors used in Fig. 4c, d, e.

| Trait number | Trait                                                                       | Number of character states | Character states                                                                                                                                                                                                                                           |
|--------------|-----------------------------------------------------------------------------|----------------------------|------------------------------------------------------------------------------------------------------------------------------------------------------------------------------------------------------------------------------------------------------------|
| Tr1          | 20hr NV (Days to flowering under 20hr days without vernalization)           | 5                          | A=120 (blue)<br>C=105-119 (red)<br>D=80-104 (Green)<br>E=49-79 (purple)<br>F=27-48 (orange)                                                                                                                                                                |
| Tr2          | 20hr 3V (Days to flowering under 20hr days after 3 weeks of vernalization)  | 6                          | A=120 (blue)<br>C=105-119 (yellow)<br>D=50-104 (red)<br>E=39-49 (orange)<br>F=25-38 (purple)<br>G=16-24 (green)                                                                                                                                            |
| Tr3          | 20hr 6V (Days to flowering under 20hr days after 6 weeks of vernalization)  | 5                          | A=58-87 (blue)<br>C=30-57 (green)<br>D=25-29 (red)<br>E=20-24 (purple)<br>F=17-19 (orange)                                                                                                                                                                 |
| Tr4          | 20hr 10V(Days to flowering under 20hr days after 10 weeks of vernalization) | 4                          | A=58-71 (blue)<br>C=27-57 (red)<br>D=21-26 (green)<br>E=17-20 (orange)                                                                                                                                                                                     |
| Tr5          | flowering class                                                             | 6                          | 1=ERF, extremely rapid flowering (yellow)<br>2=RF, rapid flowering (orange)<br>3=IRF, intermediate rapid flowering (purple)<br>4=IDF, intermediate delayed flowering (green)<br>5=DF, delayed flowering (red)<br>6=EDF, extremely delayed flowering (blue) |
| Tr6          | Collection latitude                                                         | 3                          | 1 = >41.5 N (red)<br>2 = 34-41.5 N (blue)<br>3 = < 34 N (Green)<br>4= unknown (gray)                                                                                                                                                                       |
| Tr7          | PHYC_853                                                                    | 2                          | C 853 (red)<br>Y 853 (blue)                                                                                                                                                                                                                                |
| Tr8          | PHYC_1114                                                                   | 2                          | I 1114 (red)                                                                                                                                                                                                                                               |

|      |                  |   |                                                                                                                                                                        |
|------|------------------|---|------------------------------------------------------------------------------------------------------------------------------------------------------------------------|
|      |                  |   | T 1114 (blue)                                                                                                                                                          |
| Tr9  | VRN2_186         | 2 | E 186 (red)<br>G 186 (blue)                                                                                                                                            |
| Tr10 | FTL9_94          | 2 | K 92 (red)<br>T 92 (blue)                                                                                                                                              |
| Tr11 | CO2_135          | 2 | H 135 (red)<br>Y 135 (blue)                                                                                                                                            |
| Tr12 | CO2_152          | 2 | 1= single aa deletion (red)<br>0= no deletion (blue)                                                                                                                   |
| Tr13 | CO2_217          | 2 | A 217 (red)<br>T 217 (blue)                                                                                                                                            |
| Tr14 | CO2_235          | 2 | F 235 (red)<br>S 235 (blue)                                                                                                                                            |
| Tr15 | CO2_250          | 2 | G 250 (red)<br>S 250 (blue)                                                                                                                                            |
| Tr16 | FTL1_92          | 2 | 1= 80 aa deletion (red)<br>0= no deletion (blue)                                                                                                                       |
| Tr17 | FTL13_7          | 2 | I 7 (red)<br>V 7 (blue)                                                                                                                                                |
| Tr18 | FTL13_60         | 2 | I 60 (red)<br>V 60 (blue)                                                                                                                                              |
| Tr19 | FUL2_19          | 2 | G 19 (red)<br>V 19 (blue)                                                                                                                                              |
| Tr20 | FUL2_184del      | 4 | 1=deletion of aa 184-187 _4aa deletion (red)<br>2=deletion of aa 185-186 _2aa deletion (blue)<br>3=deletion of aa 186 _1aa deletion (orange)<br>0= no deletion (green) |
| Tr21 | PPD1_273         | 2 | L 273 (red)<br>R 273 (blue)                                                                                                                                            |
| Tr22 | PPD1_737         | 3 | A 737 (red)<br>G 737 (green)<br>V 737 (blue)                                                                                                                           |
| Tr23 | VRN1_intron1106  | 2 | G (red)<br>T (blue)                                                                                                                                                    |
| Tr24 | VRN1_intron1_4kb | 2 | 1= 10bp deletion ~4kb intron1 (red)<br>0= no deletion (blue)                                                                                                           |
| Tr25 | VRN1_intron1_6kb | 2 | 1= 9bp deletion ~6kb intron1 (red)<br>0= no deletion (blue)                                                                                                            |



**Supplementary Table 5.** Bayesian pairwise correlations of 19 binary flowering time traits, latitude and related flowering time molecular characters obtained for the dependent and independent models conducted in BayesTraits.

| Traits | MCMC Dependent model<br>harmonic mean (Lh) | MCMC Independent model<br>harmonic mean (Lh) | LogBF  | Correlation          |
|--------|--------------------------------------------|----------------------------------------------|--------|----------------------|
| 5_6    | -21,507                                    | -20,017                                      | -2,98  | no (weak) evidence   |
| 5_7    | -26,591                                    | -32,522                                      | 11,862 | very strong evidence |
| 5_8    | -26,291                                    | -32,849                                      | 13,116 | very strong evidence |
| 5_9    | -19,244                                    | -27,329                                      | 16,17  | very strong evidence |
| 5_10   | -30,193                                    | -35,700                                      | 11,014 | very strong evidence |
| 5_11   | -18,763                                    | -22,174                                      | 6,822  | strong evidence      |
| 5_12   | -18,106                                    | -21,705                                      | 7,198  | strong evidence      |
| 5_13   | -19,226                                    | -22,494                                      | 6,536  | strong evidence      |
| 5_14   | -30,966                                    | -36,620                                      | 11,308 | strong evidence      |
| 5_15   | -32,463                                    | -33,763                                      | 2,600  | positive evidence    |
| 5_16   | -44,674                                    | -44,007                                      | -1,334 | no (weak) evidence   |
| 5_17   | -41,660                                    | -42,978                                      | 2,636  | positive evidence    |
| 5_18   | -17,337                                    | -25,623                                      | 16,572 | very strong evidence |
| 5_19   | -37,951                                    | -35,314                                      | -5,274 | no (weak) evidence   |
| 5_21   | -25,831                                    | -28,584                                      | 5,506  | strong evidence      |
| 5_23   | -33,014                                    | -38,738                                      | 11,448 | very strong evidence |
| 5_24   | -24,390                                    | -32,280                                      | 15,780 | very strong evidence |
| 5_25   | -24,983                                    | -31,018                                      | 12,070 | very strong evidence |
| 6_7    | -27,356                                    | -27,122                                      | -0,468 | no (weak) evidence   |
| 6_8    | -28,517                                    | -25,442                                      | -6,15  | no (weak) evidence   |
| 6_9    | -22,545                                    | -19,681                                      | -5,728 | no (weak) evidence   |
| 6_10   | -30,784                                    | -28,947                                      | -3,674 | no (weak) evidence   |
| 6_11   | -14,318                                    | -13,778                                      | -1,080 | no (weak) evidence   |
| 6_12   | -15,091                                    | -14,164                                      | -1,854 | no (weak) evidence   |
| 6_13   | -16,805                                    | -15,089                                      | -3,432 | no (weak) evidence   |
| 6_14   | -30,893                                    | -30,394                                      | -0,998 | no (weak) evidence   |
| 6_15   | -28,093                                    | -26,155                                      | -3,876 | no (weak) evidence   |
| 6_16   | -41,349                                    | -37,551                                      | -7,596 | no (weak) evidence   |
| 6_17   | -38,640                                    | -36,619                                      | -4,042 | no (weak) evidence   |
| 6_18   | -18,821                                    | -18,015                                      | -1,612 | no (weak) evidence   |
| 6_19   | -31,202                                    | -28,522                                      | -5,360 | no (weak) evidence   |
| 6_21   | -21,473                                    | -22,400                                      | 1,854  | no (weak) evidence   |
| 6_23   | -34,558                                    | -31,223                                      | -6,670 | no (weak) evidence   |
| 6_24   | -26,633                                    | -24,350                                      | -4,566 | no (weak) evidence   |
| 6_25   | -26,653                                    | -24,329                                      | -4,648 | no (weak) evidence   |
| 7_8    | -23,955                                    | -39,637                                      | 31,364 | very strong evidence |

|      |         |         |        |                      |
|------|---------|---------|--------|----------------------|
| 7_9  | -30,058 | -32,716 | 5,316  | strong evidence      |
| 7_10 | -36,850 | -41,710 | 9,72   | strong evidence      |
| 7_11 | -24,421 | -26,561 | 4,28   | positive evidence    |
| 7_12 | -24,505 | -26,559 | 4,108  | positive evidence    |
| 7_13 | -26,327 | -27,515 | 2,376  | positive evidence    |
| 7_14 | -36,427 | -42,084 | 11,314 | very strong evidence |
| 7_15 | -37,055 | -38,860 | 3,61   | positive evidence    |
| 7_16 | -50,029 | -50,106 | 0,154  | weak evidence        |
| 7_17 | -45,018 | -48,772 | 7,508  | strong evidence      |
| 7_18 | -25,357 | -31,068 | 11,422 | very strong evidence |
| 7_19 | -42,824 | -41,321 | -3,006 | no (weak) evidence   |
| 7_21 | -31,368 | -33,467 | 4,198  | positive evidence    |
| 7_23 | -37,668 | -44,937 | 14,538 | very strong evidence |
| 7_24 | -29,872 | -36,659 | 13,574 | very strong evidence |
| 7_25 | -28,972 | -36,221 | 14,498 | very strong evidence |
| 8_9  | -28,045 | -32,983 | 9,876  | strong evidence      |
| 8_10 | -37,683 | -41,377 | 7,388  | strong evidence      |
| 8_11 | -24,808 | -26,891 | 4,166  | positive evidence    |
| 8_12 | -24,973 | -27,003 | 4,06   | positive evidence    |
| 8_13 | -26,201 | -27,840 | 3,278  | positive evidence    |
| 8_14 | -34,841 | -41,786 | 13,89  | very strong evidence |
| 8_15 | -40,396 | -38,698 | -3,396 | no (weak) evidence   |
| 8_16 | -50,566 | -50,541 | -0,05  | no (weak) evidence   |
| 8_17 | -44,871 | -48,676 | 7,61   | strong evidence      |
| 8_18 | -24,198 | -31,328 | 14,26  | very strong evidence |
| 8_19 | -42,494 | -41,199 | -2,59  | no (weak) evidence   |
| 8_21 | -31,885 | -34,742 | 5,714  | strong evidence      |
| 8_23 | -37,261 | -44,014 | 13,506 | very strong evidence |
| 8_24 | -28,486 | -36,299 | 15,626 | very strong evidence |
| 8_25 | -28,350 | -36,673 | 16,646 | very strong evidence |
| 9_10 | -30,157 | -35,538 | 10,762 | very strong evidence |
| 9_11 | -21,767 | -21,379 | -0,776 | no (weak) evidence   |
| 9_12 | -19,592 | -21,041 | 2,898  | positive evidence    |
| 9_13 | -18,278 | -24,151 | 11,746 | very strong evidence |
| 9_14 | -31,278 | -36,051 | 9,546  | strong evidence      |
| 9_15 | -32,217 | -32,602 | 0,77   | weak evidence        |
| 9_16 | -44,368 | -44,323 | -0,09  | no (weak) evidence   |
| 9_17 | -42,775 | -42,802 | 0,054  | weak evidence        |
| 9_18 | -18,535 | -24,804 | 12,538 | very strong evidence |
| 9_19 | -36,868 | -36,331 | -1,074 | no (weak) evidence   |
| 9_21 | -27,046 | -28,271 | 2,45   | positive evidence    |

|       |         |         |        |                      |
|-------|---------|---------|--------|----------------------|
| 9_23  | -34,392 | -38,202 | 7,619  | strong evidence      |
| 9_24  | -25,868 | -31,939 | 12,142 | very strong evidence |
| 9_25  | -25,946 | -30,817 | 9,742  | strong evidence      |
| 10_11 | -27,404 | -30,842 | 6,876  | strong evidence      |
| 10_12 | -28,522 | -28,493 | -0,058 | no (weak) evidence   |
| 10_13 | -29,194 | -30,555 | 2,722  | positive evidence    |
| 10_14 | -35,800 | -45,125 | 18,65  | very strong evidence |
| 10_15 | -38,008 | -40,810 | 5,604  | strong evidence      |
| 10_16 | -53,404 | -52,343 | -2,122 | no (weak) evidence   |
| 10_17 | -50,099 | -51,073 | 1,948  | weak evidence        |
| 10_18 | -27,130 | -34,028 | 13,796 | very strong evidence |
| 10_19 | -44,715 | -44,028 | -1,374 | no (weak) evidence   |
| 10_21 | -35,041 | -36,488 | 2,894  | positive evidence    |
| 10_23 | -43,613 | -46,714 | 6,202  | strong evidence      |
| 10_24 | -35,740 | -38,983 | 6,486  | strong evidence      |
| 10_25 | -35,030 | -39,749 | 9,438  | strong evidence      |
| 11_12 | -11,835 | -14,621 | 5,572  | strong evidence      |
| 11_13 | -17,253 | -16,266 | -1,974 | no (weak) evidence   |
| 11_14 | -27,062 | -31,774 | 9,424  | strong evidence      |
| 11_15 | -27,701 | -26,682 | -2,038 | no (weak) evidence   |
| 11_16 | -38,080 | -37,604 | -0,952 | no (weak) evidence   |
| 11_17 | -36,910 | -39,153 | 4,486  | positive evidence    |
| 11_18 | -16,794 | -19,255 | 4,922  | positive evidence    |
| 11_19 | -30,966 | -29,922 | -2,088 | no (weak) evidence   |
| 11_21 | -20,854 | -22,434 | 3,16   | positive evidence    |
| 11_23 | -30,806 | -33,910 | 6,208  | strong evidence      |
| 11_24 | -24,659 | -24,499 | -0,32  | no (weak) evidence   |
| 11_25 | -23,320 | -25,218 | 3,796  | positive evidence    |
| 12_13 | -17,785 | -16,379 | -2,812 | no (weak) evidence   |
| 12_14 | -27,405 | -31,793 | 8,776  | strong evidence      |
| 12_15 | -27,441 | -28,533 | 2,184  | positive evidence    |
| 12_16 | -38,781 | -38,591 | -0,38  | no (weak) evidence   |
| 12_17 | -37,044 | -37,345 | 0,602  | weak evidence        |
| 12_18 | -16,056 | -18,039 | 3,966  | positive evidence    |
| 12_19 | -31,428 | -29,481 | -3,894 | no (weak) evidence   |
| 12_21 | -19,866 | -21,972 | 4,212  | positive evidence    |
| 12_23 | -30,851 | -32,472 | 3,242  | positive evidence    |
| 12_24 | -23,679 | -24,731 | 2,104  | positive evidence    |
| 12_25 | -22,989 | -24,199 | 2,42   | positive evidence    |
| 13_14 | -30,268 | -31,154 | 1,772  | weak evidence        |
| 13_15 | -24,534 | -28,984 | 8,9    | strong evidence      |

|       |         |         |        |                      |
|-------|---------|---------|--------|----------------------|
| 13_16 | -39,676 | -39,054 | -1,244 | no (weak) evidence   |
| 13_17 | -40,335 | -37,891 | -4,888 | no (weak) evidence   |
| 13_18 | -17,690 | -19,326 | 3,272  | positive evidence    |
| 13_19 | -31,571 | -30,096 | -2,95  | no (weak) evidence   |
| 13_21 | -22,265 | -23,123 | 1,716  | weak evidence        |
| 13_23 | -32,124 | -34,479 | 4,71   | positive evidence    |
| 13_24 | -23,001 | -26,103 | 6,204  | strong evidence      |
| 13_25 | -23,506 | -25,704 | 4,396  | positive evidence    |
| 14_15 | -34,773 | -42,535 | 15,524 | very strong evidence |
| 14_16 | -52,315 | -53,048 | 1,466  | weak evidence        |
| 14_17 | -49,974 | -52,719 | 5,49   | strong evidence      |
| 14_18 | -27,654 | -35,026 | 14,744 | very strong evidence |
| 14_19 | -45,610 | -44,194 | -2,832 | no (weak) evidence   |
| 14_21 | -34,949 | -41,428 | 12,958 | very strong evidence |
| 14_23 | -43,953 | -47,466 | 7,026  | strong evidence      |
| 14_24 | -35,683 | -41,510 | 11,654 | very strong evidence |
| 14_25 | -36,121 | -39,809 | 7,376  | strong evidence      |
| 15_16 | -49,083 | -49,279 | 0,392  | weak evidence        |
| 15_17 | -46,703 | -50,272 | 7,138  | strong evidence      |
| 15_18 | -30,032 | -30,466 | 0,868  | weak evidence        |
| 15_19 | -42,135 | -40,598 | -3,074 | no (weak) evidence   |
| 15_21 | -34,185 | -33,671 | -1,028 | no (weak) evidence   |
| 15_23 | -44,433 | -43,317 | -2,232 | no (weak) evidence   |
| 15_24 | -36,910 | -36,229 | -1,362 | no (weak) evidence   |
| 15_25 | -35,500 | -37,013 | 3,026  | positive evidence    |
| 16_17 | -60,778 | -59,713 | -2,13  | no (weak) evidence   |
| 16_18 | -42,105 | -41,988 | -0,234 | no (weak) evidence   |
| 16_19 | -51,020 | -52,282 | 2,524  | positive evidence    |
| 16_21 | -45,202 | -45,256 | 0,108  | weak evidence        |
| 16_23 | -56,100 | -54,898 | -2,404 | no (weak) evidence   |
| 16_24 | -49,290 | -47,704 | -3,172 | no (weak) evidence   |
| 16_25 | -47,780 | -47,924 | 0,288  | weak evidence        |
| 17_18 | -40,543 | -40,858 | 0,63   | weak evidence        |
| 17_19 | -51,159 | -52,593 | 2,868  | positive evidence    |
| 17_21 | -45,304 | -44,695 | -1,218 | no (weak) evidence   |
| 17_23 | -47,115 | -54,040 | 13,85  | very strong evidence |
| 17_24 | -45,896 | -47,000 | 2,208  | positive evidence    |
| 17_25 | -46,044 | -46,954 | 1,82   | weak evidence        |
| 18_19 | -35,592 | -33,979 | -3,226 | no (weak) evidence   |
| 18_21 | -22,565 | -26,503 | 7,876  | strong evidence      |
| 18_23 | -32,183 | -35,907 | 7,448  | strong evidence      |

|       |         |         |        |                      |
|-------|---------|---------|--------|----------------------|
| 18_24 | -22,594 | -28,345 | 11,502 | very strong evidence |
| 18_25 | -23,260 | -28,306 | 10,092 | very strong evidence |
| 19_21 | -37,141 | -36,942 | -0,398 | no (weak) evidence   |
| 19_23 | -47,448 | -46,296 | -2,304 | no (weak) evidence   |
| 19_24 | -40,799 | -39,152 | -3,294 | no (weak) evidence   |
| 19_25 | -40,473 | -40,933 | 0,92   | weak evidence        |
| 21_23 | -37,533 | -39,418 | 3,77   | positive evidence    |
| 21_24 | -28,373 | -32,040 | 7,334  | strong evidence      |
| 21_25 | -30,178 | -31,703 | 3,05   | positive evidence    |
| 23_24 | -36,345 | -41,985 | 11,28  | very strong evidence |
| 23_25 | -36,774 | -41,996 | 10,444 | very strong evidence |
| 24_25 | -22,832 | -34,497 | 23,33  | very strong evidence |

**Supplementary Table 6.** Number of Leaves on parent shoot at time of flowering (Mean and SD "+/-"). Plants grown under 20 hours light/day. NV=no vernalization, 3wkV= 3 weeks of vernalization, 6wkV = 6 weeks of vernalization, and 10wkV = 10 weeks of vernalization. ERF=extremely rapid flowering, RF=rapid flowering, IRF=intermediate rapid flowering, IDF=intermediate delayed flowering, DF=delayed flowering, and EDF=extremely delayed flowering.

| inbred line | NV            | 3wkV          | 6wkV          | 10wkV         | Flowering Class |
|-------------|---------------|---------------|---------------|---------------|-----------------|
| Bd21        | 6.0 +/- 0.00  | 4.2 +/- 0.408 | 5.0 +/- 0.00  | 4.5 +/- 0.548 | ERF             |
| Bd3-1       | 7.0 +/- 0.00  | 5.0 +/- 0.00  | 4.8 +/- 0.408 | 4.8 +/- 0.408 | RF              |
| Bd21-3      | 6.7 +/- 0.516 | 4.0 +/- 0.00  | 4.7 +/- 0.516 | 4.5 +/- 0.548 | RF              |
| Bd30-1      | 9.0 +/- 0.753 | 4.8 +/- 0.408 | 5.0 +/- 0.00  | 5.0 +/- 0.00  | IRF             |
| Bd2-3       | 10 +/- 1.03   | 5.0 +/- 0.00  | 5.0 +/- 0.00  | 5.0 +/- 0.00  | IRF             |
| BdTR13a     | 12 +/- 4.55   | 5.0 +/- 0.00  | 5.2 +/- 0.408 | 5.0 +/- 0.00  | IRF             |
| BdTR2B      | 12 +/- 2.48   | 4.5 +/- 0.548 | 5.0 +/- 0.00  | 5.0 +/- 0.00  | IRF             |
| BdTR13C     | 11 +/- 2.34   | 4.7 +/- 0.512 | 4.8 +/- 0.408 | 5.0 +/- 0.00  | IRF             |
| Bis-1       | 11 +/- 1.45   | 4.0 +/- 0.00  | 5.0 +/- 0.00  | 5.0 +/- 0.00  | IRF             |
| BdTR11I     | 12 +/- 1.55   | 5.4 +/- 0.890 | 5.0 +/- 0.00  | 5.0 +/- 0.00  | IDF             |
| Arn1        | 13 +/- 0.707  | 4.2 +/- 0.408 | 4.6 +/- 0.548 | 5.0 +/- 0.00  | IDF             |
| Mon3        | 14 +/- 1.82   | 5.0 +/- 0.00  | 5.0 +/- 0.00  | 5.0 +/- 0.00  | IDF             |
| Gaz-8       | 13 +/- 0.987  | 5.1 +/- .628  | 5.0 +/- 0.00  | 5.0 +/- 0.00  | IDF             |
| BdTR5I      | 15 +/- 0.577  | 5.3 +/- 0.456 | 5.0 +/- 0.00  | 5.0 +/- 0.00  | IDF             |
| BdTR2G      | 15 +/- 1.79   | 4.4 +/- 0.548 | 5.0 +/- 0.00  | 5.0 +/- 0.00  | IDF             |
| BdTR3C      | 16 +/- 1.12   | 5.0 +/- 0.00  | 5.0 +/- 0.00  | 5.0 +/- 0.00  | IDF             |
| Adi-12      | 17 +/- 0.945  | 4.3 +/- 0.578 | 4.5 +/- 0.707 | 5.0 +/- 0.00  | IDF             |
| BdTR10C     | 16 +/- 0.949  | 5.0 +/- 0.00  | 5.0 +/- 0.00  | 4.5 +/- 0.707 | IDF             |
| Kah-1       | 16 +/- 3.16   | 4.7 +/- 0.516 | 5.0 +/- 0.00  | 5.0 +/- 0.00  | IDF             |
| BdTR1i      | 16 +/- 2.33   | 4.2 +/- 0.448 | 5.0 +/- 0.00  | 5.0 +/- 0.00  | IDF             |
| Koz-1       | 18 +/- 0.782  | 4.0 +/- 0.00  | 5.0 +/- 0.00  | 5.0 +/- 0.00  | IDF             |
| Adi-2       | 18 +/- 1.67   | 4.8 +/- 0.667 | 5.0 +/- 0.00  | 5.0 +/- 0.00  | IDF             |
| Kah-5       | 19 +/- 2.03   | 4.0 +/- 0.00  | 5.0 +/- 0.00  | 5.0 +/- 0.00  | IDF             |
| BdTR11G     | 17 +/- 1.26   | 5.5 +/- 0.577 | 5.0 +/- 0.00  | 5.0 +/- 0.00  | IDF             |
| BdTR11A     | 17 +/- 1.50   | 5.5 +/- 0.577 | 5.0 +/- 0.00  | 5.0 +/- 0.00  | IDF             |
| BdTR9K      | 17 +/- 0.916  | 4.2 +/- 0.402 | 5.0 +/- 0.00  | 4.0 +/- 0.00  | IDF             |
| Adi-10      | 17 +/- 1.22   | 4.6 +/- 0.812 | 4.8 +/- 0.402 | 5.0 +/- 0.00  | IDF             |
| Koz-3       | 19 +/- 1.02   | 5.0 +/- 0.00  | 5.0 +/- 0.00  | 5.0 +/- 0.00  | IDF             |
| BdTR12c     | 17 +/- 0.753  | 5.8 +/- 0.408 | 5.0 +/- 0.00  | 4.8 +/- 0.406 | IDF             |
| Per1        | 18 +/- 2.09   | 6.7 +/- 0.812 | 5.7 +/- 0.516 | 5.5 +/- 0.548 | IDF             |
| Uni2        | >19 +/- 0.00  | 6.2 +/- 1.20  | 5.0 +/- 0.00  | 5.5 +/- 0.548 | DF              |
| ABR3        | >19 +/- 0.00  | 7.0 +/- 0.578 | 5.5 +/- 0.578 | 5.0 +/- 0.00  | DF              |
| ABR8        | 18 +/- 2.35   | 6.5 +/- 1.65  | 5.5 +/- 0.578 | 5.0 +/- 0.00  | DF              |
| ABR7        | >19 +/- 0.00  | 6.7 +/- 0.812 | 4.7 +/- 0.516 | 5.0 +/- 0.00  | DF              |
| Bd18-1      | >19 +/- 0.00  | 6.8 +/- 1.22  | 5.0 +/- 0.00  | 5.5 +/- 0.548 | DF              |
| Mig3        | >19 +/- 0.00  | 6.2 +/- 1.56  | 5.2 +/- 0.216 | 5.0 +/- 0.00  | DF              |
| Bd1-1       | >19 +/- 0.00  | 7.0 +/- 0.894 | 4.8 +/- 0.401 | 5.0 +/- 0.00  | DF              |
| RON2        | >19 +/- 0.00  | 7.0 +/- 0.354 | 6.0 +/- 0.408 | 6.5 +/- 0.546 | DF              |
| ABR5        | >19 +/- 0.00  | 9.1 +/- 1.80  | 6.3 +/- 0.500 | 6.8 +/- 0.673 | DF              |
| ABR4        | >19 +/- 0.00  | 7.5 +/- 0.837 | 8.0 +/- 1.22  | 6.0 +/- 0.00  | DF              |
| Mur1        | >19 +/- 0.00  | 7.0 +/- 0.00  | 5.0 +/- 0.00  | 6.1 +/- 1.22  | DF              |
| ABR6        | >19 +/- 0.00  | 8.2 +/- 1.17  | 5.8 +/- 0.401 | 5.0 +/- 0.00  | DF              |
| Sig2        | >19 +/- 0.00  | 8.3 +/- 3.67  | 5.8 +/- 0.753 | 5.0 +/- 0.00  | DF              |
| Luc1        | >19 +/- 0.00  | 8.5 +/- 1.64  | 6.0 +/- 0.00  | 5.7 +/- 0.517 | DF              |
| ABR2        | >19 +/- 0.00  | 10 +/- 1.23   | 5.0 +/- 0.00  | 5.0 +/- 0.00  | DF              |
| Foz1        | >19 +/- 0.00  | 8.7 +/- 2.54  | 6.1 +/- 0.412 | 5.0 +/- 0.00  | DF              |
| BdTR7a      | >19 +/- 0.00  | 16 +/- 3.45   | 13 +/- 1.94   | 12 +/- 0.894  | EDF             |
| Tek-2       | >19 +/- 0.00  | 18* +/- 4.56  | 16 +/- 0.983  | 13 +/- 2.48   | EDF             |
| BdTR8i      | >19 +/- 0.00  | >19 +/- 0.00  | 16 +/- 1.17   | 16 +/- 1.02   | EDF             |
| Tek-4       | >19 +/- 0.00  | >19 +/- 0.00  | 16 +/- 0.983  | 15 +/- 1.43   | EDF             |
| Bd29-1      | >19 +/- 0.00  | >19 +/- 0.00  | 16 +/- 3.51   | 6.0 +/- 0.516 | EDF             |
| ABR9        | >19 +/- 0.00  | 9.5 +/- 1.74  | 8.0 +/- 0.629 | 7.0 +/- 1.21  | EDF             |

**Supplementary Table 7. Days to Heading (Mean and SD "+/-"). Plants**

grown under 20 hours light/day. NV=no vernalization, 3wkV= 3 weeks of vernalization, 6wkV = 6 weeks of vernalization, and 10wkV = 10 weeks of vernalization. ERF=extremely rapid flowering, RF=rapid flowering, IRF=intermediate rapid flowering, IDF=intermediate delayed flowering, DF=delayed flowering, and EDF=extremely delayed flowering.

|         | NV            | 3wkV          | 6wkV         | 10wkV        | Flowering Class |
|---------|---------------|---------------|--------------|--------------|-----------------|
| Bd21    | 27 +/- 0.837  | 16 +/- 0.516  | 17 +/- 0.00  | 17 +/- 0.00  | ERF             |
| Bd3-1   | 33 +/- 3.09   | 19 +/- 1.03   | 20 +/- 0.632 | 18 +/- 0.837 | RF              |
| Bd21-3  | 32 +/- 3.27   | 16 +/- 0.00   | 17 +/- 0.00  | 17 +/- 0.00  | RF              |
| Bd30-1  | 49 +/- 6.09   | 20 +/- 0.408  | 21 +/- 0.00  | 20 +/- 0.00  | IRF             |
| Bd2-3   | 51 +/- 6.87   | 21 +/- 4.55   | 20 +/- 0.408 | 22 +/- 0.577 | IRF             |
| BdTR13a | 68 +/- 9.79   | 23 +/- 0.707  | 22 +/- 0.816 | 21 +/- 0.447 | IRF             |
| BdTR2B  | 63 +/- 20.89  | 21 +/- 3.33   | 23 +/- 0.548 | 27 +/- 2.22  | IRF             |
| BdTR13C | 63 +/- 5.31   | 23 +/- 1.55   | 22 +/- 1.09  | 21 +/- 0.00  | IRF             |
| Bis-1   | 67 +/- 7.63   | 20 +/- 1.03   | 28 +/- 16.4  | 22 +/- 1.34  | IRF             |
| BdTR11I | 73 +/- 24.8   | 28 +/- 2.54   | 25 +/- 1.33  | 24 +/- 1.03  | IDF             |
| Arn1    | 79 +/- 11.1   | 25 +/- 3.14   | 25 +/- 0.516 | 24 +/- 0.00  | IDF             |
| Mon3    | 79 +/- 13.2   | 26 +/- 2.5    | 23 +/- 1.55  | 22 +/- 2.04  | IDF             |
| Gaz-8   | 84 +/- 29.5   | 20 +/- 1.10   | 21 +/- 0.00  | 21 +/- 0.00  | IDF             |
| BdTR5I  | 89 +/- 5.77   | 28 +/- 2.61   | 27 +/- 5.13  | 24 +/- 0.00  | IDF             |
| BdTR2G  | 83 +/- 8.64   | 22 +/- 3.2    | 22 +/- 1.16  | 26 +/- 2.12  | IDF             |
| BdTR3C  | 87 +/- 4.45   | 22 +/- 1.73   | 21 +/- 0.00  | 22 +/- 0.894 | IDF             |
| Adi-12  | 99 +/- 11.3   | 21 +/- 0.00   | 20 +/- 2.00  | 22 +/- 1.95  | IDF             |
| BdTR10C | 93 +/- 14.3   | 25 +/- 1.86   | 25 +/- 3.40  | 28 +/- 0.00  | IDF             |
| Kah-1   | 93 +/- 14.9   | 21 +/- 1.03   | 21 +/- 0.00  | 21 +/- 0.00  | IDF             |
| BdTR1i  | 100 +/- 6.78  | 22 +/- 2.95   | 22 +/- 0.50  | 24 +/- 0.00  | IDF             |
| Koz-1   | 103 +/- 9.91  | 23 +/- 2.58   | 21 +/- 2.51  | 17 +/- 0.408 | IDF             |
| Adi-2   | 105* +/- 11.3 | 20 +/- 0.5    | 23 +/- 0.816 | 26 +/- 0.983 | IDF             |
| Kah-5   | 105 +/- 3.71  | 20 +/- 0.00   | 21 +/- 1.15  | 24 +/- 0.50  | IDF             |
| BdTR11G | 103 +/- 9.9   | 25 +/- 2.87   | 24 +/- 0.957 | 21 +/- 0.00  | IDF             |
| BdTR11A | 108* +/- 9.79 | 29 +/- 2.00   | 24 +/- 0.577 | 20 +/- 2.12  | IDF             |
| BdTR9K  | 103 +/- 9.29  | 21 +/- 1.09   | 20 +/- 0.812 | 21 +/- 0.00  | IDF             |
| Adi-10  | 101 +/- 9.98  | 22 +/- 1.33   | 20 +/- 0.00  | 21 +/- 0.00  | IDF             |
| Koz-3   | 113* +/- 5.64 | 26 +/- 1.83   | 26 +/- 2.30  | 27 +/- 1.38  | IDF             |
| BdTR12c | 113 +/- 8.21  | 30 +/- 2.32   | 22 +/- 1.03  | 23 +/- 1.83  | IDF             |
| Per1    | 106* +/- 21.1 | 36 +/- 3.34   | 27 +/- 1.75  | 29 +/- 2.25  | IDF             |
| Uni2    | >120 +/- 0.00 | 34 +/- 13.1   | 25 +/- .408  | 22 +/- 2.25  | DF              |
| ABR3    | >120 +/- 0.00 | 35 +/- 3.46   | 28 +/- 0.00  | 25 +/- .564  | DF              |
| ABR8    | >120 +/- 0.00 | 35 +/- 5.16   | 25 +/- 1.02  | 23 +/- .768  | DF              |
| ABR7    | 110* +/- 13.3 | 36 +/- 5.72   | 23 +/- 1.96  | 27 +/- 2.21  | DF              |
| Bd18-1  | >120 +/- 0.00 | 41 +/- 6.99   | 25 +/- 0.00  | 28 +/- 0.00  | DF              |
| Mig3    | 115* +/- 23.7 | 45 +/- 18.8   | 25 +/- 1.47  | 27 +/- 2.22  | DF              |
| Bd1-1   | >120 +/- 0.00 | 47 +/- 8.17   | 24 +/- 1.22  | 25 +/- 2.00  | DF              |
| RON2    | >120 +/- 0.00 | 46 +/- 7.50   | 36 +/- 4.55  | 25 +/- 2.21  | DF              |
| ABR5    | >120 +/- 0.00 | 47 +/- 12.0   | 35 +/- 2.38  | 38 +/- 1.50  | DF              |
| ABR4    | >120 +/- 0.00 | 50 +/- 5.33   | 42 +/- 6.71  | 33 +/- 1.15  | DF              |
| Mur1    | 111* +/- 5.23 | 51 +/- 21.4   | 26 +/- 1.86  | 30 +/- 1.51  | DF              |
| ABR6    | >120 +/- 0.00 | 52 +/- 10.3   | 32 +/- 2.00  | 35 +/- 3.00  | DF              |
| Sig2    | 119* +/- 10.3 | 52 +/- 14.1   | 30 +/- 2.64  | 30 +/- 3.21  | DF              |
| Luc1    | 118* +/- 0.00 | 62 +/- 11.2   | 27 +/- 1.79  | 32 +/- 3.29  | DF              |
| ABR2    | >120 +/- 0.00 | 64 +/- 11.5   | 22 +/- .983  | 27 +/- 2.12  | DF              |
| Foz1    | >120 +/- 0.00 | 74 +/- 16.8   | 27 +/- 3.02  | 31 +/- 2.74  | DF              |
| BdTR7a  | >120 +/- 0.00 | 105* +/- 24.5 | 68 +/- 11.46 | 63 +/- 7.15  | EDF             |
| Tek-2   | >120 +/- 0.00 | >120 +/- 0.00 | 87 +/- 10.2  | 71 +/- 9.79  | EDF             |
| BdTR8i  | >120 +/- 0.00 | 111* +/- 20.1 | 79 +/- 10.9  | 65 +/- 4.35  | EDF             |
| Tek-4   | >120 +/- 0.00 | >120 +/- 0.00 | 80 +/- 6.33  | 58 +/- 5.50  | EDF             |
| Bd29-1  | >120 +/- 0.00 | >120 +/- 0.00 | 91* +/- 14.3 | 27 +/- 3.14  | EDF             |
| ABR9    | >120 +/- 0.00 | 65 +/- 21.4   | 58 +/- 20.4  | 28 +/- .577  | EDF             |

\*asterisk denotes some plants within treatment did not flower after 120 days of growth

>greater than sign denotes plants did not flower after 120 days of growth

Extremely Rapid Flowering (ERF), Rapid Flowering (RF), Intermediate Rapid Flowering (IRF)  
Intermediate Delayed Flowering (IDF), Delayed Flowering (DF)  
and Extremely Delayed Flowering (EDF)

## Supplementary Notes

### Supplementary Note 1. *De novo* genome assembly of 54 inbred lines

We assessed the accuracy of the assemblies by alignment of raw reads to respective genomes using BWA and SAMtools and analyzing read depth and coverage as well as the presence of nucleotide variants. We generated three different Bd21 (reference genome line) short-read data sets for this study. In all three datasets, 99.99% of the Bd21 reference genome was covered by sequence alignments, leaving only 8,965 bp; 6,396 bp; and 5,922 bp covered by fewer than three reference short-reads, respectively. Alignment of Bd21 short-reads to 51 non-reference genome assemblies yielded a median of 1 Mbp of genic sequence (Fig. 1c) and greater than 8 Mbp of non-genic sequence (~3% of the genome in total) with  $<3$  aligned reference short-reads, indicating that these sequences were missing or highly diverged from the reference accession. The control of mapping non-reference reads from two respective lines to their *de novo* assemblies produced only 234 kbp and 405 kbp of read coverage of  $<3$ , whereas reference short-reads (Bd21) validated the presence of hundreds of genes absent from the reference line (Supplementary Fig. 2c).

Similar to mapping reference reads to our non-reference assemblies, mapping reads from the non-reference accessions onto the reference genome yielded a median of 1.5 Mb of genic sequence (3,067 non-redundant reference genes in total) and greater than 7 Mb of non-genic sequence with read coverage  $<3$  (Fig. 1c). Importantly, deleted and highly divergent regions in our assemblies are distributed throughout genome, as shown by the frequency of gene deletion relative to the reference (Supplementary Fig. 2). Thus, by aligning short-reads, we verified that numerous regions in the assembled genomes are not found in the reference genome and that many of these novel sequences are found in multiple accessions.

We constructed a pan-genome based on whole-genome (WG) sequences by iteratively scanning each of the 54 genome assemblies and adding DNA sequences that were  $> 600$  bp long (enough to contain a small gene) and did not contain any 21 bp sequence found in the preceding sequences using Vmatch with the qnomatch option (<http://www.vmatch.de>). The average size of the DNA blocks not contained in the reference genome was ~1.5 kb. In total, 57,402 blocks were over 1 kb, and these sequences were added to the reference sequence to produce a 391 Mb WG pan-genome. Scaffold sequences were covered by contigs over 99.3% of their total length.



## Supplementary Note 2. Correlated evolution of flowering time traits and related molecular traits

Correlated evolution of traits was investigated using BAYESTRAITS<sup>9</sup>. We analyzed 19 (out of 25) traits, representing the 5 flowering-time traits (1-5) by a single trait (flowering class, 5) to avoid redundancy. Flowering traits (Tr1-Tr4) and flowering class trait (Tr5) are set according to Ream et. al. (2014)<sup>10</sup> and Woods et al. (2016)<sup>11</sup>. For simplicity, flowering class and latitude were re-coded as binary traits (flowering class: EDF vs non-EDF; latitude: <34°N vs >34°N) and were correlated to 17 binary gene traits. The program computes pairwise correlation analysis between binary traits, allowing to test for correlated evolution by comparing the fit (log-likelihood) of two continuous-time Markov models, the independent model in which the two traits evolve independently on the tree, and the dependent model in which the traits evolve in a correlated fashion such that the rate of change in one trait depends upon the background state of the other. We calculated the logarithm of the harmonic mean of the likelihoods for each model through Bayesian MCMC searches of 1010000 iterations, with 10000 burn in and sampling every 1000 iterations. We applied the Bayes Factor (BF) Test statistic ( $\text{Log BF} = 2(\log[\text{harmonic mean}(\text{dependent model})] - \log[\text{harmonic mean}(\text{independent model})])$ ) for which values <2 indicate weak evidence, 2-5 positive evidence, 5-10 strong evidence and >10 very strong evidence of correlation between any pair of traits (Supplementary Table 5).

BF tests for potential correlated evolution of 19 (out of 25) binary flowering time traits and genes on the pruned SNP tree (Fig. 4a, g-j, Supplementary Figs. 5, 6a) indicated a strong (BF values =5-10) and very strong (BF >10) evidence of correlation for 13 traits (7-14, 18, 21, 23-25) with flowering class (trait 5) and to each other, and positive evidence (BFT=2-5) for two other traits (15, 17) (Supplementary Table 5). Conversely, all 18 examined traits showed weak evidence (BF <2) of correlated evolution with latitude (Supplementary Table 5; Supplementary Fig. 6b). These results support flowering class and its associated flowering time traits and genes as the main factors driving intra-specific divergence within wild populations of *B. distachyon* and discard the influence of latitudinal distribution on it.

We observed strong population structure in which lines fell into three major groups that correlated first with flowering behavior and secondly with geographic origin: a group containing mostly late-flowering lines from a broad geographic area, and a group containing earlier flowering lines, separated into two eastern and western geographical subgroups (Fig. 4a-f). Most of the lines that make up the extremely delayed flowering (EDF+) group required extended vernalization,  $\geq 6$  weeks (Supplementary Fig. 6c-e, Supplementary Tables 6 and 7). The western S+ lines group consists largely of lines that require long vernalization, around 6 weeks of cold (Fig. 4c, traits 1-5). In contrast, all the lines within the eastern T+ group (including the reference line Bd21) require 3 weeks or less of vernalization (Fig. 4c traits 1-5; Supplementary Table 6,7 for details). The three main clades can in part be recapitulated in NMDS clustering of the extensive flowering data provided in this study, with the exception of the admixed Mon3 and Arn1 (Supplementary Table 3 and 7, Supplementary Fig. 6e). Lines Mon3 and Arn1 in the EDF group showed an admixture of roughly 16-18% from the western group and these

lines flower earlier than the other EDF lines (Fig. 4c traits 1-5; Supplementary Tables 3 and 7, Supplementary Fig. 6c-e).

We found strong correlations between flowering behavior and variants within several flowering time genes (particularly the EDF+ clade), which may contribute to the different flowering behaviors and provide testable hypotheses for future studies (SNPs and indels in coding and non-coding regions of *PHYC*, *VRN1*, *VRN2*, *FTL1*, *FTL9*, *FTL13*, *FUL2*, *CO2*, *PPDI*; traits 6-14, 16-18, 20-25; Supplementary Table 5; Supplementary Fig. 6b).

### **Supplementary Note 3. Influence of intra-species TE activity on shell:core ratio by linear model analysis**

In addition to the stringent TE filtering during annotation, we evaluated the number of TEs potentially miss-annotated as genes by performing a BLASTN search using all primary CDSs annotated in *B. distachyon* as a query against the TREP database. Genes for which more than 75% of the sequence was covered by a TE with more than 95% of sequence identity were considered as potential miss-annotated genes. Only six genes were identified as putative TEs or TE derived sequences, ruling out an effect of miss-annotation on the GLM analysis or the effect of TEs on gene expression.

The potential impact of TE variants on the gene shell:core ratio was then tested using Generalized Linear Models (GLM, logit link). In our models, the shell:core ratio calculated in 2.5Mbp fixed intervals (provided as a number of successes, number of failures) was entered as a dependent variable and the ratio of TE non-reference insertions:core insertions or the ratio of absent insertions:core insertions were entered as explanatory variables. Models were run in R 3.1.3. Pseudo McFadden  $R^2$  were calculated in R using the library (BaylorEdPsych). The shell:core ratio was significantly influenced by the intra-species TE activity (non reference insertion and deletion) relative to the reference line ( $z= 19.4$ ,  $df= 107$ ,  $p<2e-16$ , pseudo  $R^2=0.42$  and  $z= 17.6$ ,  $df= 107$ ,  $p<2e-16$ , pseudo  $R^2=0.35$  respectively). For each model, the normal distribution of the residuals were confirmed with QQplots.

In order to investigate the respective contribution of the shell/core ratio and TE activity on the loss of synteny, we first built a full glm model where the non-syntenic/syntenic ratio (provided as a number of successes, number of failures) was entered as a dependent variable and the shell/core ratio, non-reference TE, deletion TE and all their interactions were entered as predictors. Interactions, however, were dropped as non-significant. We then compared the percentage of deviance explained by the full model (without interaction) to the percentage of deviance explained by successive models from which we either dropped the shell/core ratio, the non-reference TE or the deletion TE from the predictors.

## Supplementary Methods

### *De novo* genome assembly of 54 inbred lines

We assembled 54 genomes for divergent *B. distachyon* inbred lines, including a reference control. Five genome assemblies (Gaz-8, Kah-1, Tek-4, Bd3-1, Adi-10) were smaller than expected, probably because they were assembled from HiSeq2000 data with shorter read lengths (75 bp) and lower sequencing depth. Since the amount of genic sequence contained in the lower-quality assemblies was similar to the average and reference genome, we included them in the construction of the pan-genome, but excluded them from analyses for which complete non-coding sequence was required.

While the total lengths of our assemblies were about the same as the reference genome, even the best assemblies were in many smaller pieces (range: 957-73,776 scaffolds). To make the assemblies easier to work with and provide physical context, for each assembly we used synteny to the reference genome to order and orientate scaffolds into five pseudomolecules corresponding to the five *B. distachyon* chromosomes and an additional super-scaffold containing unassigned sequence. Synteny was identified with CoGe SynMap<sup>12</sup> (<https://genomeevolution.org/CoGe/SynMap.pl>) using the default parameters with a minimal number of genes set to two for the *Brachypodium distachyon* Bd21(v2.0)<sup>13</sup> genome. We used the CoGe SynMap syntenic path assembly algorithm to order scaffolds into syntenic pseudomolecules based on the inferred synteny to the reference, in which scaffolds were joined using 100 "N"s. For the best assembly, 97% of the total sequence was placed into five chromosomes<sup>12</sup> (Fig. 1b). On average 72% of the total assembly length of each line was placed into five pseudomolecules. Scaffolds that were too small or contained too few genes to be positioned via synteny were concatenated, separated by Ns, and included in the final assembly as an accessory sequence. Significantly, no reference sequence was added to any of the assemblies during this process. Syntenically ordered scaffolds provided the chromosomal location for novel sequence that was contained on scaffolds with flanking syntenic anchors. Thus, utilizing high-quality whole-genome assemblies and syntenic information is sufficient to identify the physical position of most novel sequences.

Final assemblies were evaluated for errors and corrected using the alignments of the raw reads to the individual assemblies using BWA<sup>14</sup> (BWA v.0.7.10) and SAMtools (<http://www.htslib.org>) (SAMtools v. 0.1.18). BUSCO (v2)<sup>15</sup> as well as CEGMA<sup>16</sup> were used to assess the completion of the genome assemblies based on the presence of core eukaryotic genes (Supplementary Fig. 1, Supplementary Table 2). The software was run with default parameters with the included reference dataset.

### Gene annotation

Annotation began by creating assembled transcripts for three *B. distachyon* lines (Bd21, Bd21-3, Bd1-1) for which we had deep Illumina paired-end RNA-seq transcriptome data. For Bd1-1, 57,070 transcript assemblies were constructed using PASA (v. r2011\_05\_20)<sup>17</sup> from 58,292 RNA-seq transcripts derived from Bd1-1 assemblies

using PERTRAN (JGI plant reference-based transcriptome assembly pipeline). For Bd21, 72,305 transcript assemblies were constructed using PASA from 310,090 ESTs derived from PERTRAN and 454 sequences. For Bd21-3, 56,184 transcript assemblies were constructed using PASA from 59,927 RNA-seq transcripts derived from Bd21-3 paired-end Illumina RNA-seq reads using PERTRAN pipeline.

In the general annotation pipeline, loci were determined by alignments of the assembled transcripts above and/or EXONERATE (v. 2.2.0)<sup>18</sup> alignments of proteins from six plants (*Arabidopsis thaliana*, *Glycine max*, *Sorghum bicolor*, *Oryza sativa*, *Setaria italic* and *Vitis vinifera*) and the Swiss-Prot database (uniprot eukaryote 07/2014) of eukaryote proteins to the respective soft-repeat masked genome using RepeatMasker<sup>19</sup> with up to 2K BP extension on both ends unless extending into another locus on the same strand. Gene models were predicted by homology-based predictors, FGENESH+ (v. 2.6)<sup>20</sup>, FGENESH\_EST (similar to FGENESH+, EST as splice site and intron input instead of protein/translated ORF), and GenomeScan<sup>21</sup>.

The highest scoring predictions for each locus were selected using multiple positive factors including EST and protein support, and one negative factor: overlap with repeats. The selected gene predictions were improved by PASA. Improvement includes adding UTRs, splicing correction, and adding alternative transcripts. PASA-improved gene model proteins were subject to protein homology analysis to the above mentioned proteomes to obtain Cscore and protein coverage. Cscore is a protein BLASTP score ratio to MBH (mutual best hit) BLASTP score, and protein coverage is the highest percentage of protein aligned to the best of homologs. PASA-improved transcripts were selected based on Cscore, protein coverage, EST coverage, and CDS overlap with repeats. Transcripts were selected if they had a Cscore  $\geq 0.5$  and protein coverage  $\geq 0.5$ , or if they had EST coverage and less than 20% of the CDS overlapped repeats. For gene models where  $>20\%$  of the CDS overlapped repeats, its Cscore must be at least 0.9 and homology coverage at least 70% to be selected. The selected gene models were subject to Pfam analysis and gene models whose protein is more than 30% in Pfam TE domains were removed.

Bd21, Bd21-3, Bd1-1 were annotated via the above annotation pipeline to produce a set of high-confidence full-length transcripts. Annotation yielded 30,683 primary transcript models for Bd1-1, 30,995 primary transcript models for Bd21-3 and 31,532 primary transcript models for Bd21. Transcripts from these three annotated genomes were filtered for gene model completeness and transcriptome or high homology support to proteomes from other species. The filtered transcripts were further filtered for any sign of TE protein domains or sequence redundancy (473,807 sequences). These filtered models were then used as full-length transcripts in annotating all 55 genome assemblies (including two reference controls), as well as the WG pan-genome compiled from unannotated DNA sequence using Vmatch. The WG pan-genome annotation identified 45,863 primary loci, of which 38,390 were deemed complete by the presence of a valid start and stop codon. As a control, we re-annotated the reference genome with the same pipeline, yielding 32,712 primary loci, of which 30,877 were complete.

## Gene Ontology enrichment

Genes were functionally annotated using PFAM, KOG, and Panther using the primary transcript. Interproscan was used to assign GO terms. Enrichment of Gene Ontology terms was determined by topGO (v. 2.22)<sup>22</sup> and additionally with goatools<sup>23</sup> (v0.6.10) in order to obtain FDR estimates for particular enrichments.

## Transposable element annotation and analysis for individual *B. distachyon* lines

Transposable elements (TEs) and repeats were annotated in additional detail for the following *B. distachyon* lines in order to determine their effect on adjacent gene expression: ABR5, ABR3, ABR6, ABR4, ABR2, ABR7, ABR8, Bd18-1, BdTR2g, BdTR2b, BdTR1i, BdTR3d, Koz-1, Bis-1, BdTR13a, BdTR11g, BdTR11i, BdTR10c, BdTR5i, Kah-5, BdTR12c, BdTR9k, Adi-12, Adi-2, Bd2-3, Bd21 and ABR9.

RepeatMasker<sup>19</sup> (v. 4-0.5) was run on *B. distachyon* genomes using RMBlast and a combined library of exemplar repetitive DNA elements (oxyrep.ref, grasrep.ref, mcotrep.ref) downloaded from RepBase20.06 (<http://www.girinst.org/repbase/>).

TEs were assigned to the class of the best matching repetitive element from the repeat library. Genes from the cloud pan-genome were removed prior to downstream analysis. For each of the 27 *B. distachyon* lines listed above, BedTools<sup>24</sup> was used to map repetitive elements to the 1 kb region upstream from the translation start site of the gene model with the longest transcript and to determine repetitive element coverage in the same region. Expression levels (KDMM-normalized counts) were log<sub>2</sub>-transformed and values  $\leq 1$  were set to 0. Syntenic orthologs across the above genome assemblies were determined by aliasing genes to their reference genome ortholog, using an in-house lift-over pipeline (described below) that uses synteny information, as described below. Statistical analyses and plots were performed using R.

## Identification of homeologous gene pairs in Fig. 5f

Homeologous gene pairs were identified by running CoGe SynMap<sup>12</sup> (<https://genomeevolution.org/CoGe/SynMap.pl>) and filtered using Quota Align at a 1:1 syntenic depth on hard-masked *Brachypodium distachyon* Bd21(v2.0)<sup>13</sup> against itself. SynMap outputs a list of syntenic blocks of genes along with percentage nucleotide identity. Genes from blocks with 60-87% nucleotide identity were retained as homeologous gene pairs from the pre-grass whole-genome duplication.

## Leaf expression data for 36 inbred lines

To estimate transcript abundance for each gene model, we used transcriptome sequencing of greenhouse grown plants from 36 accessions. To estimate transcript abundance for each gene model, we used transcriptome sequencing of greenhouse grown plants from 36 accessions. Seeds of each accession were sowed in 600mL of moist Profile porous ceramic rooting media (Profile Products) in Deepot D40H pots and then cold-stratified at 6°C for 14d to ensure synchronized germination. Two replicates of each accession were

grown for 21 days at 25°C and we then harvested the two youngest, fully-expanded leaves of each plant directly onto liquid nitrogen. RNA was extracted with the Spectrum Plant Total RNA kit (Sigma) according to the manufacturer's specifications. We also performed an on-column DNase treatment (Qiagen). We prepared short-read RNASeq libraries using a 3' tag-seq approach as described<sup>25</sup>. Raw reads were quality filtered and mapped using two different approaches.

For quantifying expression of cloud genes, we mapped filtered reads to respective pan-gene transcripts using BWA mem, processed these using picard, and sorted reads were then stacked and counted by gene model using each genome's cognate gene annotation.

For plots in Figure 3e and the Transposable Element analysis (see below, gene expression levels across 27 assemblies to evaluate the effect of TEs on gene expression), we mapped filtered reads to the reference Bd21 v2.1 genome (downloaded from Phytozome on 9 April 2014) using BWA<sup>14</sup>. Mapping files were processed using picard tools (<http://broadinstitute.github.io/picard>) and then stacked and counted by gene model (Bd21 v2.1 annotation). Sequence tags from each library were normalized to sequencing depth using the KDMM procedure in JMPGenomics 6.1 (SAS Institute).

### **Expression analysis of *B. distachyon* interaction with wheat stem rust and diurnal sampling**

We performed an RNAseq experiment on the interaction of the non-reference accession, Bd1-1, with the grass fungal pathogen *P. graminis* f. sp. *tritici* (*Pg-tr*), a pathogen of wheat and barley at two different time points. Three independent replicates were performed for both mock treatment and *Pg-tr* treatment. For all trials sampling of 12 and 18 hpi were performed at 6 am and 11:30 am, respectively. This corresponded to dawn and midday, allowing us to also observe genes that are under diurnal regulation. Leaves were collected and immediately flash frozen in liquid nitrogen before storage at -80°C. Frozen leaves were ground in liquid nitrogen using a mortar and pestle. Total RNA extractions were performed using Concert™ Plant RNA Reagent (Invitrogen). mRNA was prepared into a library using ScriptSeq™ v2 RNA-Seq Library Preparation Kit (Epicentre) following the stranded (dUTP) protocol. 101bp single-end Illumina sequencing was performed, generating raw reads. Raw fastq file reads were filtered and trimmed using the JGI QC pipeline resulting in the filtered fastq and raw reads were evaluated for artifact sequence by kmer matching (kmer=25), allowing 1 mismatch and detected artifact was trimmed from the 3' end of the reads. RNA spike-in reads, PhiX reads and reads containing any Ns were removed. Quality trimming was performed using the phred trimming method set at Q6. Filtered reads from each library were aligned to the reference genome using HISAT<sup>26</sup> (v. 0.1.4-beta) and featureCounts<sup>27</sup> was used to generate the raw gene counts. DESeq2<sup>28</sup> (v. 1.10.0) was subsequently used to determine which genes were differentially expressed between pairs of conditions. The parameters used to call a gene DE between conditions were p-value < 0.05.

## ***B. distachyon* lineage-specific genes and expression breadth of genes**

Data on genes specific to *B. distachyon* (lineage-specific,  $1 \times 1$ ) versus shared relative to rice and sorghum was taken from a remapping of gene identifiers to the v2.1 *B. distachyon* annotation based on published orthoMCL comparisons to the three species<sup>29</sup>. Gene expression data (Fragments Per Kilobase of transcript per Million mapped reads, FPKM) for nine distinct tissues, representing a wide-range of tissue types of the *B. distachyon* Bd21 reference line was used for determining expression breadth<sup>29</sup>. In our study, narrow gene expression was defined as expression in fewer than or equal to 3 tissues types, while broad expression was defined as expression in 7 or more tissue types. KDMM-normalized expression data for 36 accessions was plotted for core versus shell genes, present within the reference annotation, in Fig. 3e.

## **Clustering pan-gene models**

As annotated genes residing on each individual assembly were not necessarily syntenic, we identified related genes across assemblies by grouping the 1,796,495 gene models across assemblies by sequence similarity using Markov clustering in the GET\_HOMOLOGUES-EST pipeline<sup>30</sup> ([https://github.com/eead-csic-compbio/get\\_homologues](https://github.com/eead-csic-compbio/get_homologues)) with minimum alignment coverage of 75%. This algorithm takes BLASTN hits, adding up all non-overlapping aligned segments and computing coverage over the shortest sequence, to drive Markov clustering of CDS sequences. This strategy was found to be more robust to partial gene models and skipped exons than CD-HIT-EST. This resulted in 61,155 pan-genome clusters. The 61,155 pan-genome clusters were reduced to 57,819 non-redundant gene clusters by collapsing clusters with  $\geq 95\%$  identity and  $\geq 75\%$  alignment coverage. We then selected a single gene from each cluster as the pan-gene representative for further analysis. For clusters containing a gene from the v2.1 reference annotation the reference gene was selected as the pan-gene. For clusters without a reference gene the gene from the first line in the cluster (alphabetical) was selected as the pan-gene (correspondence between pan-genes and genes within clusters is provided through phytozome: <https://phytozome.jgi.doe.gov/pz/portal.html>). To validate the presence/absence variation inferred from the transcript clustering, raw reads were aligned to the pan-genes (genomic sequence) using BWA (BWA v. 0.7) and SAMtools (SAMtools v. 0.1.18). Genes with a read depth  $< 3$  over more than 20% of the gene were considered absent.

## **dN/dS calculation**

CDS nucleotide sequences and corresponding peptide sequences of pan-genome single-copy clusters with occupancy  $\geq 4$  (the minimum number of sequences required for these calculations) were selected. For each cluster, peptide sequences were aligned with clustal-omega<sup>31</sup> (v1.2.1) and the resulting alignments translated back to codon-based nucleotide alignments using the primers4clades suite<sup>32</sup>. Each DNA alignment was then passed to yn00\_cds\_prealigned, obtained from<sup>33</sup> (<https://github.com/hyphaltip/subopt-kaks>), to estimate the ratio of nonsynonymous substitutions per nonsynonymous site (dN) to the number of synonymous substitutions per synonymous site (dS) of all pairs of

sequences in a cluster. Pairs with  $dS=0$  were assigned  $\omega=0$ . The resulting plot was produced with R (<https://www.r-project.org>) *boxplot* function and parameters `notch=T, varwidth=F, outline=F`.

### **Pan-genome size simulations**

These simulations were performed with GET\_HOMOLOGUES-EST<sup>30</sup>, the same software used to cluster pan-genome sequences ([https://github.com/ead-csic-compbio/get\\_homologues](https://github.com/ead-csic-compbio/get_homologues)), with parameters `-M -c`. The simulations estimate how many novel CDS nucleotide sequences are added when the set of 56 *B. distachyon* genomes are iteratively sampled in random order. For each genome, CDS sequences with BLASTN multi-hsp coverage  $\geq 75\%$  and sequence identity  $\geq 90\%$  to previously processed CDS are considered homologues and thus not added to the growing pan-genome pool. Sequences internally labelled as inparalogues are also discarded. Note that the order in which genomes are added affects the estimated pool size, and for this reason sampling was replicated 20 times.

### **Transfer non-reference gene models to the reference genome**

In stepwise fashion we attempted to transfer non-reference gene models onto the reference genome using our in-house liftover pipeline. First, each non-reference locus' genomic sequence including introns, if any, and up to 1 kb of upstream and downstream sequence is obtained. For intergenic spaces less than 2 kb, the sequence is split evenly between the two adjacent loci. The non-reference locus sequences were then mapped to the Bd21 v2.0 reference genome using BLAT. Sequences mapped to more than one location were assigned to a unique location based on the synteny of neighboring genes. When a locus genomic sequence mapped to the reference genome uniquely and 100%, the gene model is perfectly transferred to the new genome. For the remaining gene models, both their transcript and CDS sequences were mapped with BLAT<sup>24</sup> to a region in the reference genome as described mapping above. Gene models were then made from CDS alignments with  $\geq 95\%$  identity over  $\geq 90\%$  of the CDS, valid splice sites if any, and were considered transferred if the resulting peptide was  $\geq 70\%$  similar to the peptide predicted from the original gene model. UTRs were added, if any, using transcript alignments. Still untransferred gene models were mapped to the reference genome using GMAP (v. 2007-09-28)<sup>34</sup> Gene models based on GMAP alignments with quality of 95% identity, 70% coverage and valid splice sites if any are transferred if and only if resulting gene model peptide is 70% or more similar to the original gene model peptides and in a location not occupied by gene models transferred in earlier steps.

For gene models that were not transferred under the criteria of 70% or greater peptide similarity to the original model, we masked the *B. distachyon* reference genome for annotated genes and subsequently used *exonerate*<sup>18</sup> to scan the presence of gene remnants.



## Phylogenetic analysis

For whole genome phylogenetic analysis, maximum Likelihood (ML) phylogenetic analysis was performed on the high-confidence SNPs of the 53 *B. distachyon* lines in RAxML<sup>35</sup> (v. 8.0.0). We imposed the General Time Reversible model with gamma distribution and a proportion of invariant sites (GTR+I+G) substitution model in the searches. This model was selected as the optimal model after a pilot study with a reduced data set by jMODELTEST (v. 2) based on the Akaike Information Criterion (AIC)<sup>36, 37</sup>. We computed 20 ML starting trees from 20 alternative randomized Maximum Parsimony (MP) trees, searching for best-scoring ML trees and estimating branch support for the best tree from 1000 bootstrap replicates (BS). RAxML trees were mid-point rooted. The best ML tree with bipartitions bootstrap support of branches was visualized with FigTree (v. 1.4.0) (<http://tree.bio.ed.ac.uk/software/figtree/>).

Genomic structure among the *B. distachyon* lines was assessed with STRUCTURE (v. 2.3.4)<sup>38</sup>, imposing an admixture ancestry model and a correlated allele frequencies model. We estimated values of genomic-group differentiation ( $K$ ) between 1 and 6, considering that up to 3 main genetic groups were detected in our phylogenetic ML analysis (see Fig. 4a). Each search consisted of an initial burn-in of 5000 Markov Chain Monte Carlo (MCMC) iterations followed by 5000 additional MCMC iterations, and estimation of cluster membership ( $q$ ) set to a 10% threshold value. Ten replicates were run for each  $K$ . The number of genomic groups (clusters) in the data was estimated using STRUCTURE HARVESTER (v. 0.9.94)<sup>39</sup>, which identifies the optimal  $K$  based both on the posterior probability of the data for a given  $K$  and the rate of change in the likelihood distribution among  $K$ s ( $\Delta K$ ; Evanno et al. 2005). These outcomes were visualized using the software DISTRUCT (v. 1.1)<sup>40</sup>.

$F_{ST}$  between the three major groups identified by STRUCTURE was estimated by vcftools<sup>41</sup> using the weighted Weir and Cockerham method on the SNP data file.

Inbreeding coefficient of each line was estimated by vcftools<sup>41</sup> using the 3,933,264 SNP data set. The median inbreeding coefficient was 0.8846 which is consistent with the normally inbreeding nature of *B. distachyon* and the inbreeding of most lines in the lab. The reference line, Bd21, which has undergone seven generations of single seed descent, had a coefficient of 0.9988, indicating that it is nearly entirely homozygous. Line Uni2 was an outlier, having a coefficient of 0.4848 suggesting that it was recently hybridized.

## Phylogenetic analysis of *VRN1*

For the pan-genome *BdVRN1* tree, the Bd21 *VRN1* sequence (including the putative 1.5kb promoter, exons and introns, total of 10.76kb) was used to perform a BLASTN search in the assembled genomes of 48 lines (Adi-10, Bd3-1, Gaz-8, Tek-4 and ABR8 were not included). In 46 accessions the BLASTN search identified one unambiguous hit in each genome and the corresponding sequences were extracted. In the remaining two accessions, Kah-1 and ABR5, the 10.76kb sequence had to be manually assembled

because the sequence was split across two contigs. The 49 sequences (including the Bd21 control) were aligned using MAFFT and a phylogenetic tree was constructed using PHYML with 100 bootstrap replicates, both performed in Geneious (v 9.1.5) (<http://www.geneious.com>)<sup>42</sup>.

For the read mapping *BdVRN1* tree, the variants of the different accessions (in VCF format) were implemented on the reference sequence using a custom script in Geneious, resulting in 47 sequences corresponding to the genomic sequences for the 47 lines as predicted by the read mapping variants. These sequences, along with the Bd21 control were aligned using MAFFT and a phylogenetic tree was constructed using PHYML with 100 bootstrap replicates in Geneious.

### **Flowering time measurements**

Growth chamber temperatures averaged 21°C during the 16-hour light period and 18°C during the 8-hour dark period. Flowering time of vernalized plants was measured as the number of days from the end of vernalization (or emergence of the coleoptile in non-vernalized plants) to the first day upon which emergence of the spike was detected. The number of primary leaves derived from the parent culm was recorded at the time of heading to control for development<sup>43</sup>.

### **Analysis of flowering time traits and related molecular traits evolution**

We looked at variants in known vernalization and flowering time genes that influence flowering responsiveness in *B. distachyon*. We identified and analyzed specific mutations and indels in coding and non-coding regions of candidate vernalization and flowering time genes (*PHYC*, *VRN1*, *VRN2*, *FTL1*, *FTL9*, *FTL13*, *FUL2*, *CO2*, *PPD1*) (traits 6-14, 16-18, 20-25; Supplementary Table 4)<sup>43</sup>. The evolution of the 25 flowering time traits and related molecular traits recorded in the 53 sequenced *B. distachyon* lines was analyzed using BAYESTRAITS v 2.0<sup>9</sup>. Because our ML tree was fully resolved (Supplementary Fig. 4), we estimated ancestral state reconstruction of the 25 discrete flowering time characters on this phylogeny, in which the admixed lines Arn1 and Mon3 were removed using the drop.it option of the R package APE<sup>44</sup>, leaving a tree of 49 tips and 48 nodes. Ancestral character state reconstruction was performed for each trait through Maximum Likelihood (ML) searches of 1000 iterations for multistate/binary characters. The inferred probabilities of ancestral states at tree nodes were mapped onto the tree using the plot option of APE (Fig. 4, Supplementary Fig. 5 and 6).

### **Genome-wide feature plots and analysis**

BEDTools was used to identify intersects between indels and other features as well as calculate feature frequency and/or coverage among genomic windows<sup>45</sup>. Plots and correlations were produced with R (<https://www.r-project.org>) using the ggplot2 library. Recombination rates are from published work<sup>46</sup>. We mapped the coordinates from the version 1 genome to the version 2 assembly for our calculations.

## Supplementary References

1. Draper J, *et al.* *Brachypodium distachyon*. A new model system for functional genomics in grasses. *Plant Physiology* **127**, 1539-1555 (2001).
2. Vogel JP, Tuna M, Budak H, Huo N, Gu YQ, Steinwand MA. Development of SSR markers and analysis of diversity in Turkish populations of *Brachypodium distachyon*. *BMC Plant Biology* **9**, Art. No.: 88 (2009).
3. Vogel JP, Garvin DF, Leong OM, Hayden DM. *Agrobacterium*-mediated transformation and inbred line development in the model grass *Brachypodium distachyon*. *Plant Cell Tiss Org Cult* **85**, 199-211 (2006).
4. Vogel J, Hill T. High-efficiency *Agrobacterium*-mediated transformation of *Brachypodium distachyon* inbred line Bd21-3. *Plant Cell Reports* **27**, 471-478 (2008).
5. Gordon SP, *et al.* Genome diversity in *Brachypodium distachyon*: Deep sequencing of highly diverse inbred lines. *Plant Journal* **79**, 361-374 (2014).
6. Filiz E, Ozdemir BS, Budak F, Vogel JP, Tuna M, Budak H. Molecular, morphological, and cytological analysis of diverse *Brachypodium distachyon* inbred lines. *Genome* **52**, 876-890 (2009).
7. Mur LAJ, *et al.* Exploiting the *Brachypodium* Tool Box in cereal and grass research. *New Phytologist* **191**, 334-347 (2011).
8. Rabe F, *et al.* A complete toolset for the study of *Ustilago bromivora* and *Brachypodium* sp. as a fungal-temperate grass pathosystem. *Elife* **5**, (2016).
9. Meade A, M. P. BayesTraits v 2.0. . (2014).
10. Ream TS, *et al.* Interaction of photoperiod and vernalization determines flowering time of *Brachypodium distachyon*. *Plant Physiology* **164**, 694-709 (2014).
11. Woods DP, McKeown MA, Dong Y, Preston JC, Amasino RM. Evolution of VRN2/Ghd7-like genes in vernalization-mediated repression of grass flowering. *Plant Physiology* **170**, 2124-2135 (2016).
12. Tang H, Lyons E, Pedersen B, Schnable JC, Paterson AH, Freeling M. Screening synteny blocks in pairwise genome comparisons through integer programming. *BMC Bioinformatics* **12**, 102 (2011).
13. Goodstein DM, *et al.* Phytozome: a comparative platform for green plant genomics. *Nucleic Acids Res* **40**, D1178-1186 (2012).

14. Li H, Durbin R. Fast and accurate short read alignment with Burrows-Wheeler transform. *Bioinformatics* **25**, 1754-1760 (2009).
15. Simao FA, Waterhouse RM, Ioannidis P, Kriventseva EV, Zdobnov EM. BUSCO: assessing genome assembly and annotation completeness with single-copy orthologs. *Bioinformatics* **31**, 3210-3212 (2015).
16. Parra G, Bradnam K, Korf I. CEGMA: a pipeline to accurately annotate core genes in eukaryotic genomes. *Bioinformatics* **23**, 1061-1067 (2007).
17. Haas BJ, *et al.* Improving the Arabidopsis genome annotation using maximal transcript alignment assemblies. *Nucleic Acids Res* **31**, 5654-5666 (2003).
18. Slater GS, Birney E. Automated generation of heuristics for biological sequence comparison. *BMC Bioinformatics* **6**, 31 (2005).
19. Smit AFA, Hubley R, Green P. RepeatMasker Open-3.0., (1996-2011).
20. Salamov AA, Solovyev VV. Ab initio gene finding in Drosophila genomic DNA. *Genome research* **10**, 516-522 (2000).
21. Yeh RF, Lim LP, Burge CB. Computational inference of homologous gene structures in the human genome. *Genome Res* **11**, 803-816 (2001).
22. Alexa A, Rahnenfuhrer J, Lengauer T. Improved scoring of functional groups from gene expression data by decorrelating GO graph structure. *Bioinformatics* **22**, 1600-1607 (2006).
23. Tang H, *et al.* GOATOOLS: Tools for Gene Ontology. *Zenodo*, (2015).
24. Quinlan AR. BEDTools: The Swiss-Army Tool for Genome Feature Analysis. *Current protocols in bioinformatics / editorial board, Andreas D Baxevanis [et al]* **47**, 11 12 11-34 (2014).
25. Des Marais DL, Skillern WD, Juenger TE. Deeply diverged alleles in the Arabidopsis AREB1 transcription factor drive genome-wide differences in transcriptional response to the environment. *Mol Biol Evol* **32**, 956-969 (2015).
26. Kim D, Langmead B, Salzberg SL. HISAT: a fast spliced aligner with low memory requirements. *Nat Methods* **12**, 357-360 (2015).
27. Liao Y, Smyth GK, Shi W. featureCounts: an efficient general purpose program for assigning sequence reads to genomic features. *Bioinformatics* **30**, 923-930 (2014).

28. Love MI, Huber W, Anders S. Moderated estimation of fold change and dispersion for RNA-seq data with DESeq2. *Genome biology* **15**, 550 (2014).
29. Davidson RM, *et al.* Comparative transcriptomics of three Poaceae species reveals patterns of gene expression evolution. *Plant J* **71**, 492-502 (2012).
30. Contreras-Moreira B, *et al.* Analysis of plant pan-genomes and transcriptomes with GET\_HOMOLOGUES-EST, a clustering solution for sequences of the same species. *Frontiers in Plant Science* **8**, (2017).
31. Sievers F, *et al.* Fast, scalable generation of high-quality protein multiple sequence alignments using Clustal Omega. *Molecular systems biology* **7**, 539 (2011).
32. Contreras-Moreira B, Sachman-Ruiz B, Figueroa-Palacios I, Vinuesa P. primers4clades: a web server that uses phylogenetic trees to design lineage-specific PCR primers for metagenomic and diversity studies. *Nucleic Acids Res* **37**, W95-W100 (2009).
33. Yang Z. PAML 4: phylogenetic analysis by maximum likelihood. *Mol Biol Evol* **24**, 1586-1591 (2007).
34. Wu TD, Watanabe CK. GMAP: a genomic mapping and alignment program for mRNA and EST sequences. *Bioinformatics* **21**, 1859-1875 (2005).
35. Stamatakis A. RAxML version 8: a tool for phylogenetic analysis and post-analysis of large phylogenies. *Bioinformatics* **30**, 1312-1313 (2014).
36. Darriba D, Taboada GL, Doallo R, Posada D. jModelTest 2: more models, new heuristics and parallel computing. *Nat Methods* **9**, 772 (2012).
37. Guindon S, Gascuel O. A simple, fast, and accurate algorithm to estimate large phylogenies by maximum likelihood. *Syst Biol* **52**, 696-704 (2003).
38. Pritchard JK, Stephens M, Donnelly P. Inference of population structure using multilocus genotype data. *Genetics* **155**, 945-959 (2000).
39. Earl DA, vonHoldt B. STRUCTURE HARVESTER: a website and program for visualizing STRUCTURE output and implementing the Evanno method. . *Conservation Genetics Resources* 359-361 (2012).
40. Rosenberg NA. DISTRUCT: a program for the graphical display of population structure. *Molecular Ecology Notes* **4**, 137-138 (2004).
41. Danecek P, *et al.* The variant call format and VCFtools. *Bioinformatics* **27**, 2156-2158 (2011).

42. Kearse M, *et al.* Geneious Basic: An integrated and extendable desktop software platform for the organization and analysis of sequence data. *Bioinformatics* **28**, 1647-1649 (2012).
43. Ream TS, *et al.* Interaction of photoperiod and vernalization determines flowering time of *Brachypodium distachyon*. *Plant physiology* **164**, 694-709 (2014).
44. Paradis E, Claude J, Strimmer K. APE: Analyses of Phylogenetics and Evolution in R language. *Bioinformatics* **20**, 289-290 (2004).
45. Quinlan AR, Hall IM. BEDTools: a flexible suite of utilities for comparing genomic features. *Bioinformatics* **26**, 841-842 (2010).
46. Huo N, *et al.* Comparison of a high-density genetic linkage map to genome features in the model grass *Brachypodium distachyon*. *TAG Theoretical and applied genetics Theoretische und angewandte Genetik* **123**, 455-464 (2011).
